# Supplementary material
Source: PubMed Central journal article supplement (PMC2890213)
Supplement: NIHMS207404-supplement-1_si_001.pdf [file NIHMS207404-supplement-1_si_001.pdf]

# Supporting Information

## Catalytic Nucleophilic Glyoxylation of Aldehydes

Kimberly M. Steward and Jeffrey S. Johnson\*

*Department of Chemistry, University of North Carolina at Chapel Hill, Chapel Hill, North Carolina 27599-3290*

[jsj@unc.edu](mailto:jsj@unc.edu)

### Table of Contents

|                                                                                                                                                                    |            |
|--------------------------------------------------------------------------------------------------------------------------------------------------------------------|------------|
| <b>General Methods and Materials</b>                                                                                                                               | <b>S2</b>  |
| <b>General Procedure A for the Yb(O<sup>i</sup>Pr)<sub>3</sub> catalyzed nucleophilic glyoxylation of aryl aldehydes to afford β-siloxy-α-ketoesters 4a-j</b>      | <b>S3</b>  |
| <b>General Procedure B for the Sm(O<sup>i</sup>Pr)<sub>3</sub> catalyzed nucleophilic glyoxylation of aliphatic aldehydes to afford β-siloxy-α-ketoesters 4k-l</b> | <b>S6</b>  |
| <b>Preparation of Ruthenium Catalyst 5</b>                                                                                                                         | <b>S7</b>  |
| <b>General Procedures for the Asymmetric Reduction of 4a</b>                                                                                                       | <b>S7</b>  |
| <b>Determination of Diastereomer Identity (4a)</b>                                                                                                                 | <b>S9</b>  |
| <b>Preparation of β-silyoxy-α-aminoester 7</b>                                                                                                                     | <b>S9</b>  |
| <b><sup>1</sup>H and <sup>13</sup>C NMR Spectra</b>                                                                                                                | <b>S10</b> |

## Experimental Section

**Methods: General.** Infrared (IR) spectra were obtained using a Jasco 260 Plus Fourier transform infrared spectrometer. Proton and carbon magnetic resonance spectra ( $^1\text{H}$  NMR and  $^{13}\text{C}$  NMR) were recorded on a Bruker model DRX 400 ( $^1\text{H}$  NMR at 400 MHz and  $^{13}\text{C}$  NMR at 100 MHz) spectrometer with solvent resonance as the internal standard ( $^1\text{H}$  NMR:  $\text{CDCl}_3$  at 7.26 ppm;  $^{13}\text{C}$  NMR:  $\text{CDCl}_3$  at 77.0 ppm).  $^1\text{H}$  NMR data are reported as follows: chemical shift, multiplicity (s = singlet, br s = broad singlet, d = doublet, br d = broad doublet, t = triplet, br t = broad triplet, q = quartet, sept = septuplet, oct = octuplet, m = multiplet), coupling constants (Hz), and integration. Analytical thin layer chromatography (TLC) was performed on Whatman 0.25 mm silica gel 60 plates. Visualization was accomplished with UV light and/or aqueous ceric ammonium molybdate solution followed by heating. Purification of the reaction products was carried out by using Siliacflash-P60 silica gel (40-63 $\mu\text{m}$ ) purchased from Silicycle. Mass spectra were obtained using a Micromass Quattro II (triple quad) instrument with nanoelectrospray ionization (Note: All samples prepared in methanol). All reactions were carried out under an atmosphere of nitrogen in oven-dried glassware with magnetic stirring. Yield refers to isolated yield of analytically pure material unless otherwise noted. Yields and diastereomeric ratios (dr) are reported for a specific experiment and as a result may differ slightly from those found in the tables, which are averages of at least two experiments. Enantiomeric excesses were obtained using a Supercritical Fluid Chromatograph equipped with a UV-Vis detector using a Chiralcel Chiralpak AD HPLC column. Samples were eluted with SFC grade  $\text{CO}_2$  at the indicated percentage of MeOH.

**Materials: General.** *N,N*-Dimethylformamide was distilled from  $\text{P}_2\text{O}_5$  and stored under  $\text{N}_2$  over 3 $\text{\AA}$  molecular sieves. Benzaldehyde, *p*-anisaldehyde, 4-methylbenzaldehyde, and 2-methylbenzaldehyde were purified by the following procedure: The neat aldehydes were washed sequentially with a 1 M sodium hydroxide solution and a saturated aqueous sodium bicarbonate solution, dried with magnesium sulfate, and distilled under reduced pressure. 4-Chlorobenzaldehyde was sublimed under reduced pressure. Isobutyraldehyde and propionaldehyde were dried over  $\text{CaSO}_4$  and distilled under  $\text{N}_2$  prior to use. Silyl glyoxylate **1** was prepared according to the published procedure.<sup>1</sup> All other reagents were obtained from commercial sources and used without further purification unless otherwise noted.

---

<sup>1</sup> Nicewicz, D. A.; Brét  ch  , G.; Johnson, J. S. *Org. Synth.* **2008**, 85, 278.

**General Procedure A for the Yb(O<sup>i</sup>Pr)<sub>3</sub> catalyzed nucleophilic glyoxylation of aryl aldehydes to afford β-siloxy-α-ketoesters 4a-j:**

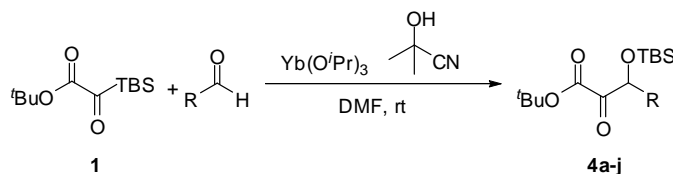

In an inert atmosphere glovebox, a 10-mL round-bottomed flask containing a magnetic stir bar was charged with Yb(O<sup>i</sup>Pr)<sub>3</sub> (0.05 equiv). The flask was sealed with a rubber septum and removed from the glovebox. To this flask was added DMF (1 mL), and this solution was allowed to stir until complete dissolution of the Yb(O<sup>i</sup>Pr)<sub>3</sub> occurred. A shell vial containing silyl glyoxylate (1.0 equiv), aldehyde (2.0 equiv) and acetone cyanohydrin (0.20 equiv) in DMF ([**1**]<sub>0</sub> = 0.20 M) was transferred to the round-bottomed flask *via* cannula. Upon the disappearance of the silyl glyoxylate (as indicated by TLC analysis: 10% EtOAc/hexanes), the reaction was quenched with 2 M aqueous silver nitrate (1 mL).<sup>2</sup> The resultant silver salts were removed via filtration through a pad of silica gel with EtOAc (20 mL). The organic layer was washed with water (3x), brine, dried over Na<sub>2</sub>SO<sub>4</sub> and concentrated *in vacuo*. The resulting α-ketoesters were obtained in analytically pure form after the removal of the excess aldehyde as described below.

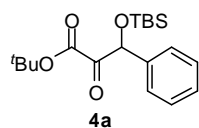

**tert-Butyl 3-(tert-butyldimethylsilyloxy)-2-oxo-3-phenylpropanoate (4a).** The title compound was prepared according to General Procedure A using **1** (1.00 g, 4.09 mmol, 1.0 equiv), benzaldehyde (0.868 g, 8.18 mmol, 2.0 equiv), acetone cyanohydrin (0.070 g, 0.818 mmol, 0.20 equiv), Yb(O<sup>i</sup>Pr)<sub>3</sub> (0.072 g, 0.205 mmol, 0.05 equiv) and

DMF (10 mL). The reaction was complete immediately upon the addition of all reagents as determined by TLC analysis. After workup and removal of the excess aldehyde *in vacuo* (<1 mm Hg), **4a** (1.20 g, 3.57 mmol, 87% yield) was obtained as a clear yellow oil. Analytical data for **4a**: **IR** (thin film, cm<sup>-1</sup>) 2956, 2931, 2857, 1748, 1725, 1472, 1257, 1132, 872, 838, 426; **<sup>1</sup>H NMR** (400 MHz, CDCl<sub>3</sub>) δ 7.30-7.42 (m, 5H), 5.56 (s, 1H), 1.43 (s, 9H), 0.90 (s, 9H), 0.10 (s, 3H), -0.010 (s, 3H); **<sup>13</sup>C NMR** (100 MHz, CDCl<sub>3</sub>) δ 193.7, 162.2, 137.0, 128.5, 127.3, 84.2, 78.3, 27.9, 25.7, 18.3, -5.0; **TLC** (10% EtOAc/hexanes) R<sub>f</sub> 0.46; **LRMS** (ESI) Calcd. For C<sub>19</sub>H<sub>30</sub>O<sub>4</sub>SiNa + CH<sub>3</sub>OH: 405.21. Found: 405.20.

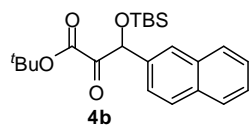

**tert-Butyl 3-(tert-butyldimethylsilyloxy)-3-(naphthalen-2-yl)-2-oxopropanoate (4b).** The title compound was prepared according to General procedure A using **1** (0.050 g, 0.205 mmol, 1.0 equiv), 2-naphthaldehyde (0.064 g, 0.410 mmol, 2.0 equiv), acetone cyanohydrin (0.0035 g, 0.041 mmol, 0.20 equiv), Yb(O<sup>i</sup>Pr)<sub>3</sub> (0.0035 g, 0.0102

mmol, 0.05 equiv) and DMF (2 mL). The reaction was complete immediately upon the addition of all reagents as determined by TLC analysis. After workup and purification by flash chromatography (10% EtOAc/hexanes), **4b** (0.076 g, 0.188 mmol, 92% yield) was obtained as a clear colorless oil. Analytical data for **4b**: **IR** (thin film, cm<sup>-1</sup>) 2955, 2931, 2886, 2857, 1747, 1724, 1370, 1255, 1164, 1127, 839, 782; **<sup>1</sup>H NMR** (400 MHz, CDCl<sub>3</sub>) δ 7.83-7.87 (m, 4H), 7.48-7.55 (m, 3H), 5.74 (s, 1H), 1.42 (s, 9H), 0.92 (s, 9H), 0.14 (s, 3H), 0.007 (s, 3H); **<sup>13</sup>C NMR** (100 MHz, CDCl<sub>3</sub>) δ 193.7, 162.3, 134.5, 133.4, 133.2, 128.4, 128.1, 127.8,

<sup>2</sup> This was necessary to remove all trace amounts of the cyanohydrin product **3**.

126.8, 126.4, 126.3, 124.7, 84.3, 78.4, 27.9, 25.7, 18.4, -4.9; **TLC** (10% EtOAc/hexanes)  $R_f$  0.42; **LRMS** (ESI) Calcd. For  $C_{23}H_{32}O_4SiNa + CH_3OH$ : 455.22. Found: 455.21.

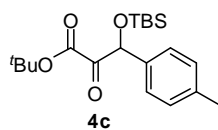

**tert-Butyl 3-(tert-butyldimethylsilyloxy)-2-oxo-3-p-tolylpropanoate (4c).** The title compound was prepared according to General procedure A using **1** (0.050 g, 0.205 mmol, 1.0 equiv), *p*-tolualdehyde (0.049 g, 0.410 mmol, 2.0 equiv), acetone cyanohydrin (0.0035 g, 0.041 mmol, 0.20 equiv),  $Yb(O^iPr)_3$  (0.0035g, 0.0102 mmol, 0.05 equiv) and DMF (2 mL). The reaction was complete immediately upon the addition of all reagents as determined by TLC analysis. After workup and removal of the excess aldehyde *in vacuo* (<1 mm Hg), **4c** (0.060 g, 0.164 mmol, 80% yield) was obtained as a clear colorless oil. Analytical data for **4c**: **IR** (thin film,  $cm^{-1}$ ) 2957, 2930, 2858, 1721, 1462, 1369, 1254, 1151, 1103, 838, 779;  **$^1H$  NMR** (400 MHz,  $CDCl_3$ )  $\delta$  7.29 (d,  $J = 8$  Hz, 2H), 7.15 (d,  $J = 8$  Hz, 2H), 5.52 (s, 1H), 2.34 (s, 3H), 1.44 (s, 9H), 0.90 (s, 9H), 0.095 (s, 3H), -0.018 (s, 3H);  **$^{13}C$  NMR** (100 MHz,  $CDCl_3$ )  $\delta$  193.8, 162.3, 138.3, 134.0, 129.2, 127.3, 84.1, 78.2, 27.9, 25.7, 21.1, 18.3, -4.99; **TLC** (10% EtOAc/hexanes)  $R_f$  0.49; **LRMS** (ESI) Calcd. For  $C_{20}H_{32}O_4SiNa + CH_3OH$ : 419.22 Found: 419.22.

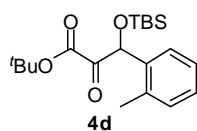

**tert-Butyl 3-(tert-butyldimethylsilyloxy)-2-oxo-3-o-tolylpropanoate (4d).** The title compound was prepared according to General procedure A using **1** (0.050 g, 0.205 mmol, 1.0 equiv), *o*-tolualdehyde (0.049 g, 0.410 mmol, 2.0 equiv), acetone cyanohydrin (0.0035 g, 0.041 mmol, 0.20 equiv),  $Yb(O^iPr)_3$  (0.0035g, 0.0102 mmol, 0.05 equiv) and DMF (2 mL). The reaction was complete immediately upon the addition of all reagents as determined by TLC analysis. After workup and removal of the excess aldehyde *in vacuo* (<1 mm Hg), **4c** (0.064 g, 0.176 mmol, 86% yield) was obtained as a clear colorless oil. Analytical data for **4d**: **IR** (thin film,  $cm^{-1}$ ) 2955, 2931, 2858, 1747, 1725, 1462, 1370, 1257, 1132, 838, 780, 746;  **$^1H$  NMR** (400 MHz,  $CDCl_3$ )  $\delta$  7.35-7.37 (m, 1H), 7.14-7.22 (m, 3H), 5.69 (s, 1H), 2.36 (s, 3H), 1.39 (s, 9H), 0.89 (s, 9H), 0.11 (s, 3H), -0.048 (s, 3H);  **$^{13}C$  NMR** (100 MHz,  $CDCl_3$ )  $\delta$  194.0, 162.7, 136.7, 135.1, 130.8, 129.1, 128.6, 126.0, 84.1, 77.3, 27.8, 25.7, 19.2, 18.2, -4.99, -5.03; **TLC** (10% EtOAc/hexanes)  $R_f$  0.49; **LRMS** (ESI) Calcd. For  $C_{20}H_{32}O_4SiNa + CH_3OH$ : 419.22 Found: 419.22.

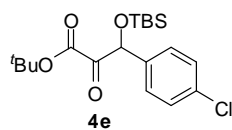

**tert-Butyl 3-(tert-butyldimethylsilyloxy)-3-(4-chlorophenyl)-2-oxopropanoate (4e).** The title compound was prepared according to General procedure A using **1** (0.050 g, 0.205 mmol, 1.0 equiv), 4-chlorobenzaldehyde (0.058 g, 0.410 mmol, 2.0 equiv), acetone cyanohydrin (0.0035 g, 0.041 mmol, 0.20 equiv),  $Yb(O^iPr)_3$  (0.0035g, 0.0102 mmol, 0.05 equiv) and DMF (2 mL). The reaction was complete immediately upon the addition of all reagents as determined by TLC analysis. After workup and removal of the excess aldehyde *in vacuo* (<1 mm Hg), **4e** (0.070 g, 0.182 mmol, 89% yield) was obtained as a clear colorless oil. Analytical data for **4e**: **IR** (thin film,  $cm^{-1}$ ) 2955, 2931, 2887, 2859, 1749, 1725, 1490, 1371, 1257, 1132, 1089, 869, 839;  **$^1H$  NMR** (400 MHz,  $CDCl_3$ )  $\delta$  7.36 (d,  $J = 8.4$  Hz, 2H), 7.32 (d,  $J = 8.4$  Hz, 2H), 5.51 (s, 1H), 1.46 (s, 9H), 0.89 (s, 9H), 0.10 (s, 3H), -0.009 (s, 3H);  **$^{13}C$  NMR** (100 MHz,  $CDCl_3$ )  $\delta$  193.3, 162.0, 135.7, 134.5, 128.7, 128.5, 84.5, 77.6, 27.9, 25.7, 18.3, -5.02; **TLC** (10% EtOAc/hexanes)  $R_f$  0.41; **LRMS** (ESI) Calcd. For  $C_{19}H_{29}ClO_4SiNa + CH_3OH$ : 439.17. Found: 439.15.

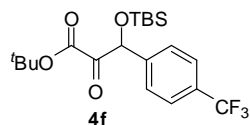

**tert-Butyl**

**3-(tert-butyldimethylsilyloxy)-2-oxo-3-(4-(trifluoromethyl)phenyl)propanoate (4f).** The title compound was prepared according to General procedure A using **1** (0.050 g, 0.205 mmol, 1.0 equiv), 4-(trifluoromethyl)benzaldehyde (0.071 g, 0.410 mmol, 2.0 equiv), acetone cyanohydrin (0.0035 g, 0.041 mmol, 0.20 equiv), Yb(O<sup>*i*</sup>Pr)<sub>3</sub> (0.0035g, 0.0102 mmol, 0.05 equiv) and DMF (2 mL). The reaction was complete immediately upon the addition of all reagents as determined by TLC analysis. After workup and removal of the excess aldehyde *in vacuo* (<1 mm Hg), **4f** (0.077g, 0.185 mmol, 90% yield) was obtained as a clear colorless oil. Analytical data for **4b**: **IR** (thin film, cm<sup>-1</sup>) 2956, 2933, 2889, 2860, 1750, 1726, 1326, 1258, 1167, 1131, 1067, 870, 839, 782; **<sup>1</sup>H NMR** (400 MHz, CDCl<sub>3</sub>) δ 7.62 (d, *J* = 8 Hz, 2H), 7.56 (d, *J* = 8 Hz, 2H), 5.58 (s, 1H), 1.46 (s, 9H), 0.91 (s, 9H), 0.12 (s, 3H), 0.01 (s, 3H); **<sup>13</sup>C NMR** (100 MHz, CDCl<sub>3</sub>) δ 193.1, 161.9, 141.2, 127.4, 125.5, 84.7, 77.8, 27.9, 25.7, 18.3, -5.00, -5.03; **TLC** (10% EtOAc/hexanes) R<sub>f</sub> 0.43; **LRMS** (ESI) Calcd. For C<sub>20</sub>H<sub>29</sub>F<sub>3</sub>O<sub>4</sub>SiNa + CH<sub>3</sub>OH: 473.19. Found: 473.17

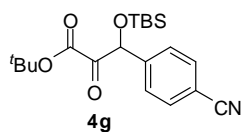

**tert-Butyl 3-(tert-butyldimethylsilyloxy)-3-(4-cyanophenyl)-2-oxopropanoate (4g).**

The title compound was prepared according to General procedure A using **1** (0.050 g, 0.205 mmol, 1.0 equiv), 4-cyanobenzaldehyde (0.054 g, 0.410 mmol, 2.0 equiv), acetone cyanohydrin (0.0035 g, 0.041 mmol, 0.20 equiv), Yb(O<sup>*i*</sup>Pr)<sub>3</sub> (0.0035g, 0.0102 mmol, 0.05 equiv) and DMF (2 mL). The reaction was complete immediately upon the addition of all reagents as determined by TLC analysis. After workup and purification by flash chromatography (10% EtOAc/hexanes), **4g** (0.071 g, 0.189 mmol, 92% yield) was obtained as a clear colorless oil. Analytical data for **4g**: **IR** (thin film, cm<sup>-1</sup>) 2955, 2931, 2859, 2230, 1750, 1730, 1502, 1394, 1257, 1133, 868, 840, 783; **<sup>1</sup>H NMR** (400 MHz, CDCl<sub>3</sub>) δ 7.66 (d, *J* = 8 Hz, 2H), 7.56 (d, *J* = 8 Hz, 2H), 5.55 (s, 1H), 1.46 (s, 9H), 0.91 (s, 9H), 0.12 (s, 3H), 0.010 (s, 3H); **<sup>13</sup>C NMR** (100 MHz, CDCl<sub>3</sub>) δ 192.7, 161.7, 142.5, 132.3, 127.6, 118.4, 112.5, 84.9, 77.7, 27.9, 25.6, 18.3, -5.01, -5.06; **TLC** (10% EtOAc/hexanes) R<sub>f</sub> 0.25; **LRMS** (ESI) Calcd. For C<sub>20</sub>H<sub>29</sub>NO<sub>4</sub>SiNa + CH<sub>3</sub>OH: 430.20. Found: 430.18

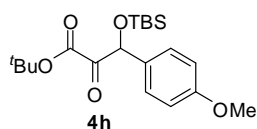

**tert-Butyl 3-(tert-butyldimethylsilyloxy)-3-(4-methoxyphenyl)-2-oxopropanoate (4h).**

The title compound was prepared according to General procedure A using **1** (0.050 g, 0.205 mmol, 1.0 equiv), *p*-anisaldehyde (0.056 g, 0.410 mmol, 2.0 equiv), acetone cyanohydrin (0.0035 g, 0.041 mmol, 0.20 equiv), Yb(O<sup>*i*</sup>Pr)<sub>3</sub> (0.0035g, 0.0102 mmol, 0.05 equiv), 2,6-lutidine (0.022 g, 0.205 mmol, 1.0 equiv) and DMF (2 mL). After stirring 20 min, the reaction was complete as determined by TLC analysis. After workup and removal of the excess aldehyde *in vacuo* (<1 mm Hg), **4h** (0.066 g, 0.174 mmol, 85% yield) was obtained as a clear colorless oil. Analytical data for **4h**: **IR** (thin film, cm<sup>-1</sup>) 2955, 2932, 2856, 1748, 1723, 1611, 1512, 1464, 1303, 1254, 1171, 1130, 1033, 870, 838, 781; **<sup>1</sup>H NMR** (400 MHz, CDCl<sub>3</sub>) δ 7.32 (d, *J* = 8.4 Hz, 2H), 6.88 (d, *J* = 8.4 Hz), 5.52 (s, 1H), 3.80 (s, 3H), 1.45 (s, 9H), 0.89 (s, 9H), 0.094 (s, 3H), -0.024 (s, 3H); **<sup>13</sup>C NMR** (100 MHz, CDCl<sub>3</sub>) δ 193.7, 162.4, 159.9, 129.1, 128.8, 114.0, 84.1, 77.9, 55.3, 27.9, 25.7, 18.3, -4.95; **TLC** (10% EtOAc/hexanes) R<sub>f</sub> 0.35; **LRMS** (ESI) Calcd. For C<sub>20</sub>H<sub>32</sub>O<sub>5</sub>SiCs + CH<sub>3</sub>OH: 545.13. Found: 545.11

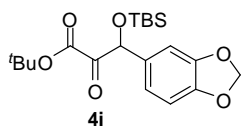

**tert-Butyl**

**3-(benzo[d][1,3]dioxol-5-yl)-3-(tert-butyldimethylsilyloxy)-2-oxopropanoate(4i).** The title compound was prepared according to General procedure A using **1** (0.050 g, 0.205 mmol, 1.0 equiv), piperonal (0.062 g, 0.410 mmol, 2.0 equiv), acetone cyanohydrin (0.0035 g, 0.041 mmol, 0.20 equiv), Yb(O<sup>*i*</sup>Pr)<sub>3</sub> (0.0035g,

0.0102 mmol, 0.05 equiv) and DMF (2 mL). The reaction was complete immediately upon the addition of all reagents as determined by TLC analysis. After workup and removal of the excess aldehyde *in vacuo* (<1 mm Hg), **4i** (0.069 g, 0.176 mmol, 86% yield) was obtained as a clear colorless oil. Analytical data for **4i**: **IR** (thin film,  $\text{cm}^{-1}$ ) 2955, 2931, 2895, 2856, 1747, 1725, 1489, 1445, 1371, 1252, 1143, 1040, 873, 839, 782;  **$^1\text{H}$  NMR** (400 MHz,  $\text{CDCl}_3$ )  $\delta$  6.90 (s, 1H), 6.86 (s,  $J = 8$  Hz, 2H), 6.77 (d,  $J = 8$  Hz, 2H), 5.96 (s, 2H), 5.47 (s, 1H), 1.47 (s, 9H), 0.90 (s, 1H), 0.098 (s, 3H), -0.005 (s, 3H);  **$^{13}\text{C}$  NMR** (100 MHz,  $\text{CDCl}_3$ )  $\delta$  193.5, 162.3, 147.9, 131.0, 121.2, 108.2, 107.7, 101.2, 84.3, 77.9, 27.9, 25.7, 18.3, -4.96, -4.99; **TLC** (10% EtOAc/hexanes)  $R_f$  0.36; **LRMS** (ESI) Calcd. For  $\text{C}_{20}\text{H}_{30}\text{O}_6\text{SiNa} + \text{CH}_3\text{OH}$ : 449.20. Found: 449.15.

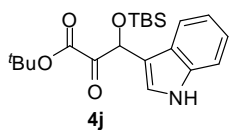

**tert-Butyl 3-(tert-butyldimethylsilyloxy)-3-(1H-indol-3-yl)-2-oxopropanoate (4j).**

The title compound was prepared according to General procedure A using **1** (0.050 g, 0.205 mmol, 1.0 equiv), indole-3-carboxaldehyde (0.060 g, 0.410 mmol, 2.0 equiv), acetone cyanohydrin (0.0035 g, 0.041 mmol, 0.20 equiv),  $\text{Yb}(\text{O}^i\text{Pr})_3$  (0.0035g, 0.0102 mmol, 0.05 equiv) and DMF (2 mL). The reaction was complete immediately upon the addition of all reagents as determined by TLC analysis. After workup and removal of the excess aldehyde by treatment with hexanes and filtration, **4j** (0.070 g, 0.180 mmol, 88% yield) was obtained as a light brown oil. Analytical data for **4b**: **IR** (thin film,  $\text{cm}^{-1}$ ) 2955, 2931, 2857, 1755, 1668, 1537, 1461, 1395, 1370, 1255, 1149, 839, 783;  **$^1\text{H}$  NMR** (400 MHz,  $\text{CDCl}_3$ )  $\delta$  10.0 (s, 1H), 8.30-8.33 (m, 1H), 7.96 (s, 1H), 7.47-7.49 (m, 1H), 7.31-7.33 (m, 2H), 6.02 (s, 1H), 1.38 (s, 9H), 0.91 (s, 9H), 0.18 (s, 3H), -0.004 (s, 3H);  **$^{13}\text{C}$  NMR** (100 MHz,  $\text{CDCl}_3$ )  $\delta$  185.0, 166.2, 136.2, 136.1, 125.5, 124.2, 123.3, 122.3, 119.4, 110.8, 83.6, 79.2, 27.8, 25.4, 18.1, -5.26, -5.31; **TLC** (10% EtOAc/hexanes)  $R_f$  0.14; **LRMS** (ESI) Calcd. For  $\text{C}_{21}\text{H}_{31}\text{NO}_4\text{SiNa}$ : 412.19. Found: 412.18.

**General Procedure B for the  $\text{Sm}(\text{O}^i\text{Pr})_3$  catalyzed nucleophilic glyoxylation of aliphatic aldehydes to afford  $\beta$ -siloxy- $\alpha$ -ketoesters **4k-l**:**

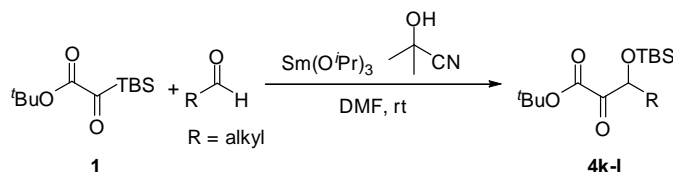

These substrates were prepared in the same manner described in General Procedure A except 10 mol %  $\text{Sm}(\text{O}^i\text{Pr})_3$  was substituted for  $\text{Yb}(\text{O}^i\text{Pr})_3$ .

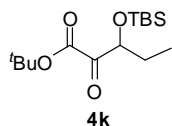

**tert-Butyl 3-(tert-butyldimethylsilyloxy)-2-oxopentanoate (4k).**

The title compound was prepared according to General procedure B using **1** (0.050 g, 0.205 mmol, 1.0 equiv), propionaldehyde (0.024 g, 0.410 mmol, 2.0 equiv), acetone cyanohydrin (0.0035, g 0.041 mmol, 0.20 equiv),  $\text{Sm}(\text{O}^i\text{Pr})_3$  (0.0067 g, 0.0205 mmol, 0.10 equiv) and DMF (2 mL). The reaction was complete immediately upon the addition of all reagents as determined by TLC analysis. After workup, **4k** (0.060 g, 0.197 mmol, 96% yield) was obtained as a clear colorless oil. Analytical data for **4k**: **IR** (thin film,  $\text{cm}^{-1}$ ) 2958, 2932, 2885, 2859, 1746, 1722, 1472, 1463, 1371, 1256, 1147, 1111, 862, 839, 780;  **$^1\text{H}$  NMR** (400 MHz,  $\text{CDCl}_3$ )  $\delta$  4.47 (t,  $J = 6.4$  Hz, 1H), 1.71-1.86 (m, 2H), 1.70 (s, 9H), 0.962 (t,  $J = 7.6$  Hz, 3H), 0.91 (s, 9H), 0.081 (s, 3H), 0.066 (s, 3H);  **$^{13}\text{C}$  NMR** (100 MHz,  $\text{CDCl}_3$ )  $\delta$  197.0, 162.8, 84.2, 77.32, 28.0, 27.3, 25.7, 18.3, 9.3, -4.81, -5.14; **TLC** (10% EtOAc/hexanes)  $R_f$  0.48; **LRMS** (ESI) Calcd. For  $\text{C}_{15}\text{H}_{30}\text{O}_4\text{SiNa} + \text{CH}_3\text{OH}$ : 357.21. Found: 357.20.

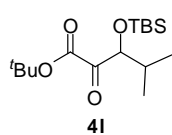

**tert-Butyl 3-(tert-butyldimethylsilyloxy)-4-methyl-2-oxopentanoate (41).** The title compound was prepared according to General procedure B using **1** (0.050 g, 0.205 mmol, 1.0 equiv), isobutyraldehyde (0.030 g, 0.410 mmol, 2.0 equiv), acetone cyanohydrin (0.0035 g, 0.041 mmol, 0.20 equiv),  $\text{Sm}(\text{O}^i\text{Pr})_3$  (0.0067 g, 0.0205 mmol, 0.10 equiv) and DMF (2 mL). The reaction was complete immediately upon the addition of all reagents as determined by TLC analysis. After workup, **41** (0.055 g, 0.174 mmol, 85% yield) was obtained as a clear colorless oil. Analytical data for **41**: **IR** (thin film,  $\text{cm}^{-1}$ ) 2960, 2932, 2859, 1745, 1722, 1472, 1371, 1255, 1147, 1073, 863, 839, 780;  **$^1\text{H}$  NMR** (400 MHz,  $\text{CDCl}_3$ )  $\delta$  4.33 (d,  $J = 5.2$  Hz, 1H), 2.11-2.17 (m, 1H), 1.54 (s, 9H), 0.98 (d,  $J = 6.8$  Hz, 3H), 0.91 (s, 9H), 0.89 (d,  $J = 6.8$  Hz, 3H), 0.049 (s, 3H), 0.038 (s, 3H);  **$^{13}\text{C}$  NMR** (100 MHz,  $\text{CDCl}_3$ )  $\delta$  196.9, 162.6, 84.1, 80.6, 31.8, 27.9, 25.8, 19.0, 18.3, 17.0, -4.74, -5.31; **TLC** (10% EtOAc/hexanes)  $R_f$  0.50; **LRMS** (ESI) Calcd. For  $\text{C}_{16}\text{H}_{32}\text{O}_4\text{SiNa} + \text{CH}_3\text{OH}$ : 371.22. Found: 371.24.

### Preparation of Ruthenium Catalyst 5

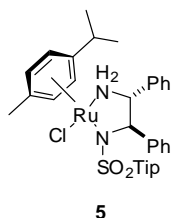

A solution of  $[\text{Ru}(p\text{-cymene})\text{Cl}_2]_2$  (4 mg/mL) and  $(R, R)\text{-}2,4,6\text{-}^i\text{Pr}_3\text{C}_6\text{H}_2\text{SO}_2\text{DPEN}^3$  (8 mg/mL) in DMF were prepared. In an inert atmosphere glovebox, a 1-dram vial containing a magnetic stir bar was charged with  $[\text{Ru}(p\text{-cymene})\text{Cl}_2]_2$  (0.383 mL, 0.005 mmol, 0.035 equiv) and  $(R, R)\text{-}2,4,6\text{-}^i\text{Pr}_3\text{C}_6\text{H}_2\text{SO}_2\text{DPEN}$  (0.375 mL, 0.006 mmol, 0.042 equiv). The vial was sealed with a PTFE-lined screw cap, removed from the glovebox, and allowed to stir at 80 °C for 30 min. After cooling to room temperature, the remaining reagents were added as described below.

### General Procedures for the Asymmetric Hydrogenation of 4a

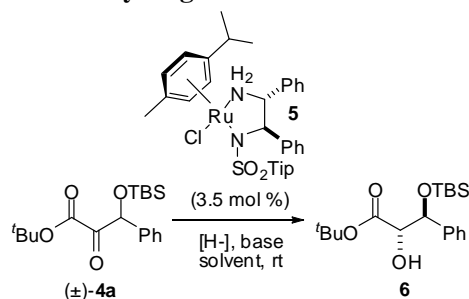

**Method A (Table 2, entries 1-3, 7):** Formic acid (0.021 g, 0.458 mmol, 3.2 equiv) was added to the amine base (1.43 mmol, 10.0 equiv) at 0 °C. The resultant mixture was then added to the 1-dram vial followed by a 1 mL solution of **4a** (0.050 g, 0.143 mmol, 1.0 equiv) in DMF. The reaction was allowed to stir at the specified temperature overnight and then diluted with EtOAc. The organic layer was washed with water (3x) then brine, dried over  $\text{Na}_2\text{SO}_4$ , and concentrated *in vacuo*.

<sup>3</sup> Yin, L.; Shan, W.; Jia, X.; Li, X.; Chan, A. S. C. *J. Organomet. Chem.* **2009**, 694, 2092.

**Method B (Table 2, entries 4-6, 12):** A 1 mL solution of **4a** (0.050 g, 0.143 mmol, 1.0 equiv) in DMF was added to the 1-dram vial followed by sodium or cesium formate (0.715 mmol, 5.0 equiv) in 0.50 mL of water. The reaction was allowed to stir at the specified temperature overnight and then diluted with EtOAc. The organic layer was washed with water (3x) then brine, dried over Na<sub>2</sub>SO<sub>4</sub>, and concentrated *in vacuo*.

**Method C (Table 2, entries 8-11):** The procedure described in Method B was followed. After the addition of the formate, the base (0.143 mmol, 10.0 equiv) was added to the reaction mixture.

(Note: After catalyst preparation in the vial, no precautions were taken to exclude air from the vessel.)

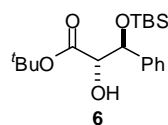

**(2S,3S)-tert-butyl 3-(tert-butyldimethylsilyloxy)-2-hydroxy-3-phenylpropanoate (6).** The title compound was prepared following Method B using **4a** (0.050 g, 0.143 mmol, 1.0 equiv) and sodium formate (0.049 g, 0.715 mmol, 5.0 equiv). After workup and purification by flash chromatography (10% EtOAc/hexanes), **6** (0.044 g, 0.124 mmol, 87% yield) was obtained as a clear colorless oil in a 3:1 dr and a 68: 32 er (for the *anti*-diastereomer) as determined by chiral SFC analysis (Chiralpack AD 3% MeOH, 1.5 mL/min, 40 °C, 210 nm, *t<sub>r</sub>*-major 15.1 min, *t<sub>r</sub>*-minor 16.0 min). Analytical data for **6**: **IR** (thin film, cm<sup>-1</sup>) 2958, 2930, 2857, 1726, 1368, 1252, 1161, 1119, 935, 837, 778, 700; **<sup>1</sup>H NMR** (400 MHz, CDCl<sub>3</sub>) major: δ 7.24-7.36 (m, 5H), 5.05 (d, *J* = 2.4 Hz), 4.24 (dd, *J* = 2.8 Hz, 8 Hz), 3.18 (d, *J* = 7.2 Hz), 1.46 (s, 9H), 0.93 (s, 9H), 0.11 (s, 3H), -0.045 (s, 3H) minor: δ 7.24-7.36 (m, 5H), 4.95 (d, *J* = 2.4 Hz), 4.03 (dd, *J* = 2.8 Hz, 8 Hz), 2.99 (d, *J* = 8.8 Hz), 1.58 (s, 9H), 0.89 (s, 9H), 0.043 (s, 3H), -0.22 (s, 3H); **<sup>13</sup>C NMR** (100 MHz, CDCl<sub>3</sub>) major: δ 171.0, 140.4, 127.8, 127.2, 126.4, 77.3, 27.9, 25.9, 18.3, -4.8, -5.0 minor: 171.5, 141.0, 128.0, 127.0, 82.3, 76.3, 28.1, 25.8, 18.1, -4.5, -5.1; **TLC** (10% EtOAc/hexanes) *R<sub>f</sub>* major: 0.43, minor: 0.38; **LRMS** (ESI) Calcd. For C<sub>19</sub>H<sub>32</sub>O<sub>4</sub>SiNa: 375.20. Found: 375.18.

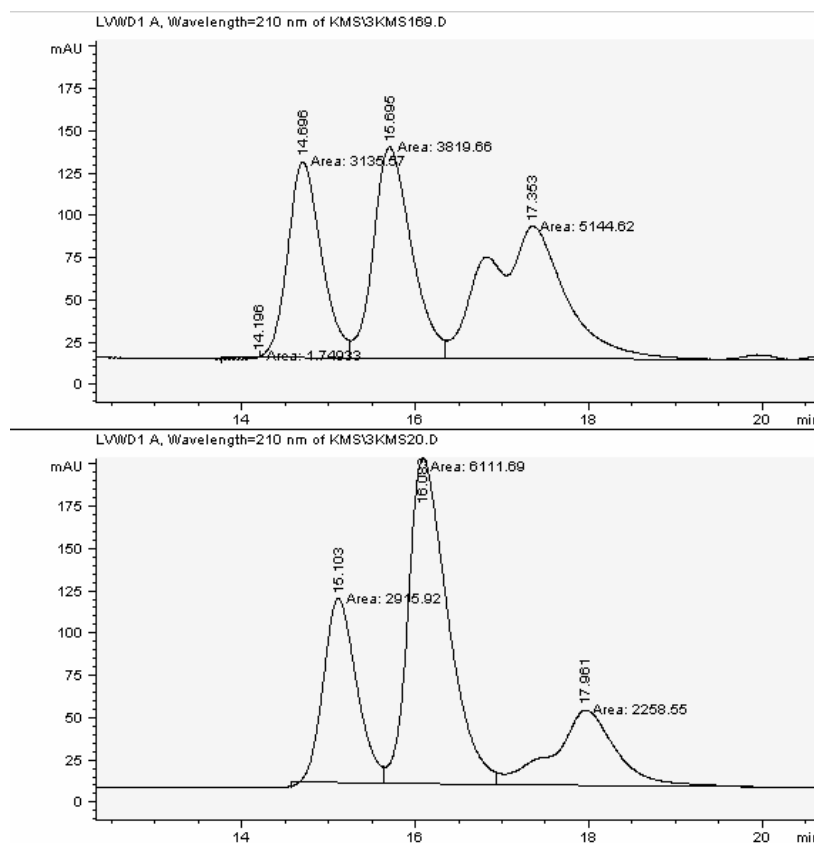



## Determination of Diastereomer Identity

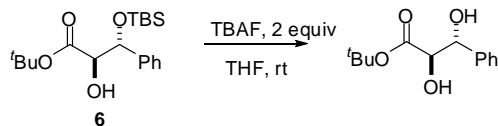

**tert-Butyl 2,3-dihydroxy-3-phenylpropanoate.** The title compound was prepared by dissolving **6** (0.040 g, 0.113 mmol, 1.0 equiv) in THF (2 mL) followed by addition of TBAF trihydrate (0.071 g, 0.226 mmol, 2.0 equiv). After stirring five minutes, TLC analysis (10% EtOAc/hexanes) showed that deprotection was complete ( $R_f(\text{diol}) \approx 0$ ). The reaction mixture was passed through a plug of silica gel with EtOAc (30 mL) and filtrate was concentrated. The spectroscopic data matched that in the literature.<sup>4</sup>

## Preparation of $\beta$ -silyoxy- $\alpha$ -aminoester **7**

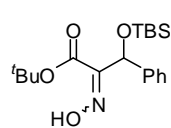

### **tert-butyl 3-(tert-butyldimethylsilyloxy)-2-(hydroxyimino)-3-phenylpropanoate.**

Hydroxylamine hydrochloride (0.396 g, 5.70 mmol, 10.0 equiv) and sodium acetate (0.468 g, 5.70 mmol, 10.0 equiv) were dissolved separately in the minimum amount of water (~ 0.5 mL) and added sequentially to a solution of **4a** (0.200 g, 0.570 mmol, 1.0 equiv) in ethanol (5 mL). The reaction was allowed to stir overnight and diluted with EtOAc. The layers were separated and the organic layer was dried over  $\text{Na}_2\text{SO}_4$  and concentrated *in vacuo*. The crude product was passed through a plug of silica gel using 20% EtOAc/hexanes to afford the oxime (0.194 g, 0.531 mmol, 93% yield) as a clear colorless oil (d.r. 5:1). Analytical data: **IR** (thin film,  $\text{cm}^{-1}$ ) 2955, 2930, 2887, 2858, 1736, 1369, 1256, 1148, 869, 838, 780, 700;  **$^1\text{H NMR}$**  (400 MHz,  $\text{CDCl}_3$ ) major:  $\delta$  11.0 (bs, 1H), 7.24-7.50 (m, 5H), 5.54 (s, 1H), 1.33 (s, 9H), 0.95 (s, 9H), 0.11 (s, 3H), 0.07 (s, 3H) minor  $\delta$  7.24-7.50 (m, 5H), 6.30 (s, 1H), 1.42 (s, 9H), 0.94 (s, 9H), 0.109 (s, 3H), 0.07 (s, 3H);  **$^{13}\text{C NMR}$**  (100 MHz,  $\text{CDCl}_3$ ) major:  $\delta$  161.6, 152.2, 140.4, 127.9, 127.2, 126.0, 84.0, 74.0, 66.7, 27.9, 25.8, 18.21, -4.8, -5.2; minor:  $\delta$  160.9, 154.7, 140.2, 127.4, 125.8, 82.6, 66.7, 29.7, 27.9, 25.7, 18.2, -4.8, -5.2; **TLC** (10% EtOAc/hexanes)  $R_f$  major: 0.45, minor: 0.34; **LRMS** (ESI) Calcd. For  $\text{C}_{19}\text{H}_{31}\text{NO}_4\text{SiNa}$ : 388.19. Found: 388.18.

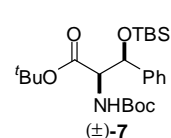

### **tert-Butyl 2-(tert-butoxycarbonylamino)-3-(tert-butyldimethylsilyloxy)-3-phenylpropanoate (**7**).**

To a 10-mL round-bottomed flask was added zinc dust (0.173 g, 2.65 mmol, 5.0 equiv) and ammonium formate (0.167 g, 2.65 mmol, 5.0 equiv). A solution of the oxime (0.194 g, 0.530 mmol, 1.0 equiv) in MeOH (5 mL) was added and the reaction was heated at reflux overnight. After cooling to room temperature, the reaction was filtered through a pad of celite. The pad was washed with MeOH (20 mL) and the filtrate was concentrated. The crude material was dissolved in EtOAc, washed with saturated  $\text{NaHCO}_3$ , water, brine, dried over  $\text{Na}_2\text{SO}_4$ , and concentrated. The crude material was dissolved in THF (3 mL) and  $(t\text{BuOC})_2\text{O}$  (0.231 g, 1.06 mmol, 2.0 equiv) was added. Sodium hydroxide (0.042 g, 1.06 mmol, 2.0 equiv) in water (2 mL) was added and the reaction was allowed to stir overnight. The reaction was diluted with water and the aqueous layer was extracted with EtOAc (3x). The combined organic extracts were washed with brine, dried over  $\text{Na}_2\text{SO}_4$ , and concentrated *in vacuo*. Purification by flash chromatography (eluting with 5% EtOAc/hexanes) afforded **7** (0.155 g, 0.410 mmol, 72% yield over three steps) as a clear colorless oil. The spectroscopic data matched that in the literature.<sup>5</sup>

<sup>4</sup> Gawas, D.; Kazmaier, U. *J. Org. Chem.* **2009**, *74*, 1788.

<sup>5</sup> Hasegawa, K.; Arai, S.; Nishida, A. *Tetrahedron*, **2006**, *62*, 1390.

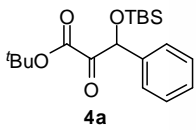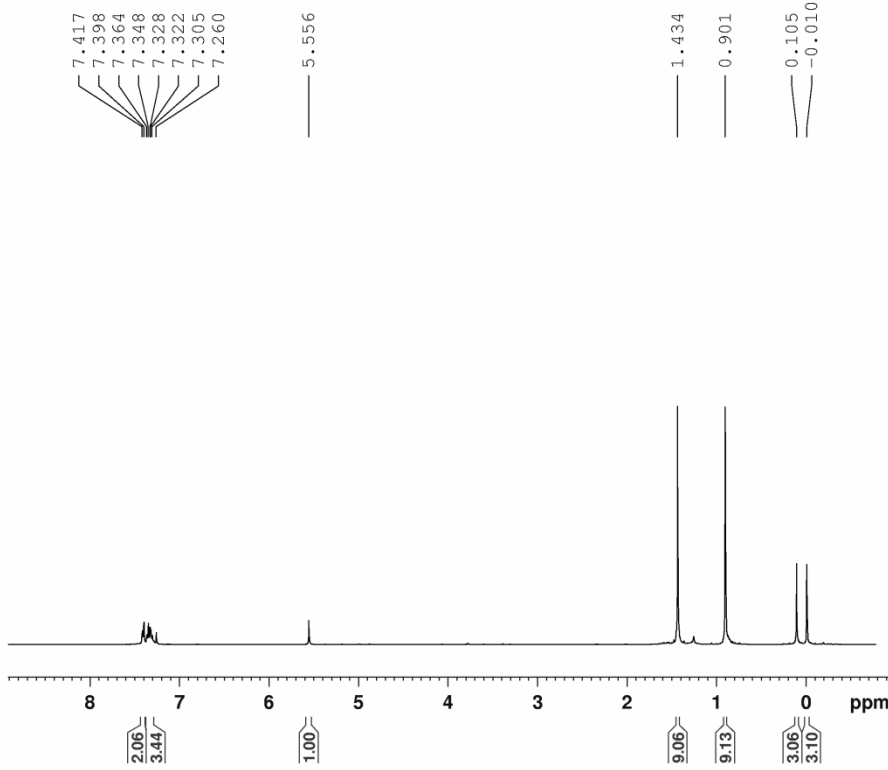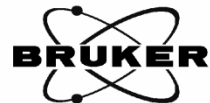

Current Data Parameters  
 NAME highvac  
 EXPNO 1  
 PROCNO 1

F2 - Acquisition Parameters  
 Date\_ 20090603  
 Time\_ 8.18  
 INSTRUM spect  
 PROBHD 5 mm TXI 13C Z  
 PULPROG zg30  
 TD 32768  
 SOLVENT CDCl3  
 NS 16  
 DS 2  
 SWH 5341.880 Hz  
 FIDRES 0.163021 Hz  
 AQ 3.0672283 sec  
 RG 80.6  
 DW 93.600 usec  
 DE 6.00 usec  
 TE 294.6 K  
 D1 1.0000000 sec  
 TDO 1

===== CHANNEL f1 =====  
 NUC1 1H  
 P1 9.95 usec  
 PL1 0.00 dB  
 SFO1 400.0923618 MHz

F2 - Processing parameters  
 SI 32768  
 SF 400.0900043 MHz  
 WDW EM  
 SSB 0  
 LB 0.25 Hz  
 GB 0  
 PC 1.00

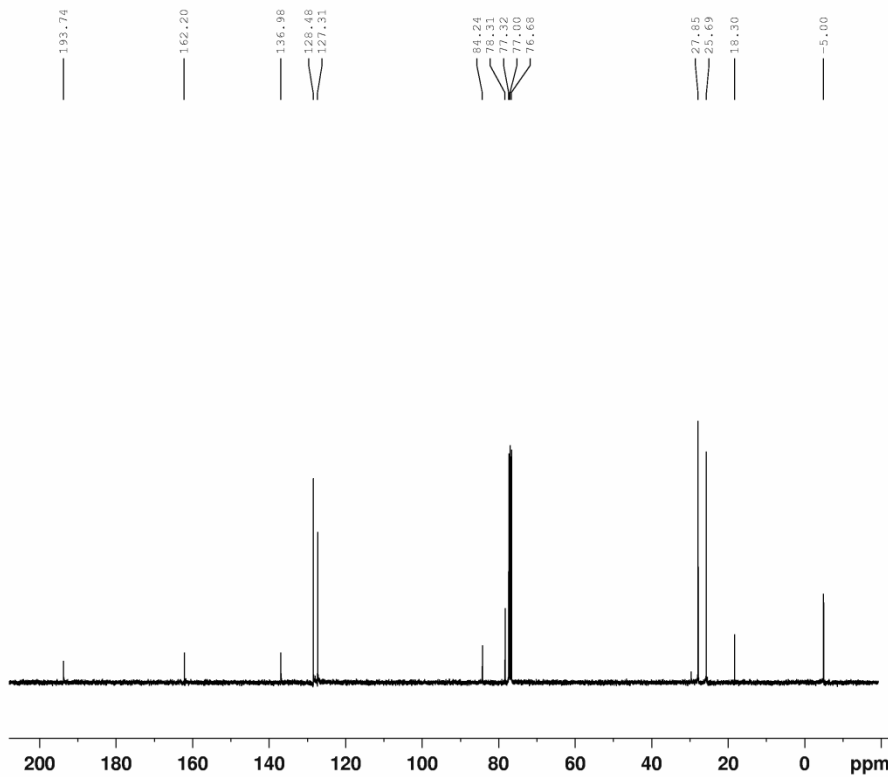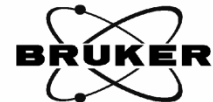

Current Data Parameters  
 NAME benzaldehyde carbon  
 EXPNO 1  
 PROCNO 1

F2 - Acquisition Parameters  
 Date\_ 20090711  
 Time\_ 9.10  
 INSTRUM spect  
 PROBHD 5 mm QNP 1H/1  
 PULPROG zgpg30  
 TD 32768  
 SOLVENT CDCl3  
 NS 1024  
 DS 2  
 SWH 23980.814 Hz  
 FIDRES 0.731836 Hz  
 AQ 0.6832628 sec  
 RG 16384  
 DW 20.850 usec  
 DE 6.00 usec  
 TE 300.0 K  
 D1 1.0000000 sec  
 d11 0.0300000 sec  
 DELTA 0.89999998 sec  
 TDO 1

===== CHANNEL f1 =====  
 NUC1 13C  
 P1 7.25 usec  
 PL1 0.00 dB  
 SFO1 100.5499020 MHz

===== CHANNEL f2 =====  
 CPDPRG2 waltz16  
 NUC2 1H  
 PCPD2 90.00 usec  
 PL2 -3.00 dB  
 PL12 16.72 dB  
 PL13 20.00 dB  
 SFO2 399.8415994 MHz

F2 - Processing parameters  
 SI 32768  
 SF 100.5398477 MHz  
 WDW EM  
 SSB 0  
 LB 1.00 Hz  
 GB 0  
 PC 1.40

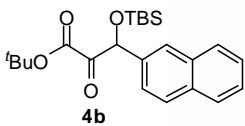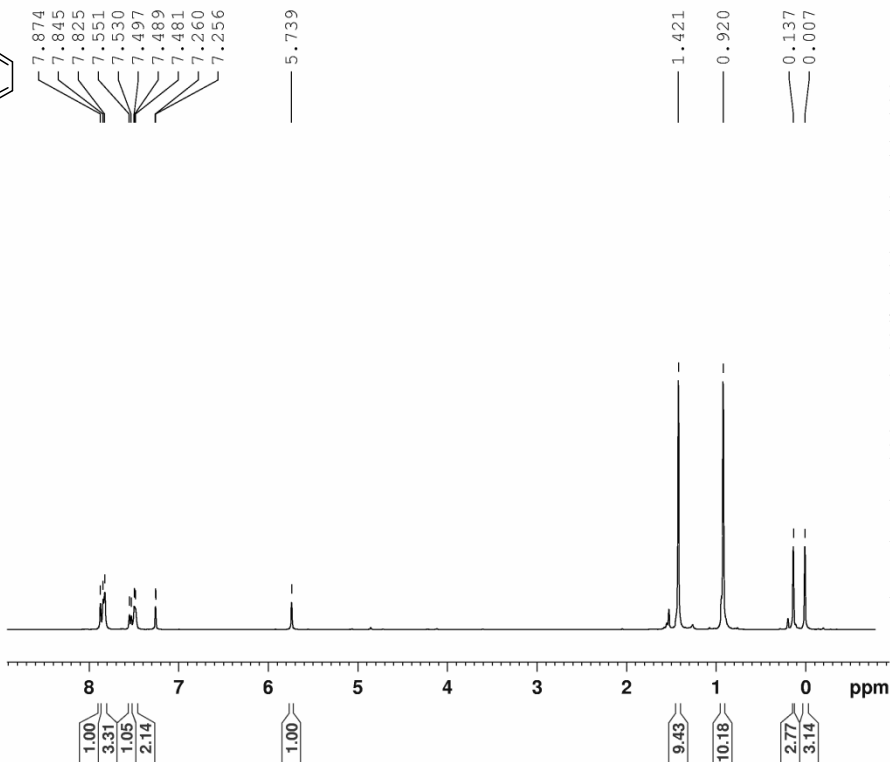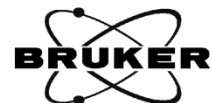

Current Data Parameters  
 NAME 3KMS216-10  
 EXPNO 1  
 PROCNO 1

F2 - Acquisition Parameters  
 Date\_ 20100216  
 Time 17.01  
 INSTRUM spect  
 PROBHD 5 mm TXI 13C Z  
 PULPROG zg30  
 TD 32768  
 SOLVENT CDCl3  
 NS 16  
 DS 2  
 SWH 5341.880 Hz  
 FIDRES 0.163021 Hz  
 AQ 3.0672283 sec  
 RG 143.7  
 DW 93.600 usec  
 DE 6.00 usec  
 TE 294.8 K  
 D1 1.00000000 sec  
 TDO 1

===== CHANNEL f1 =====  
 NUC1 1H  
 P1 9.95 usec  
 PL1 0.00 dB  
 SFO1 400.0923618 MHz

F2 - Processing parameters  
 SI 32768  
 SF 400.0900036 MHz  
 WDW EM  
 SSB 0  
 LB 0.25 Hz  
 GB 0  
 PC 1.00

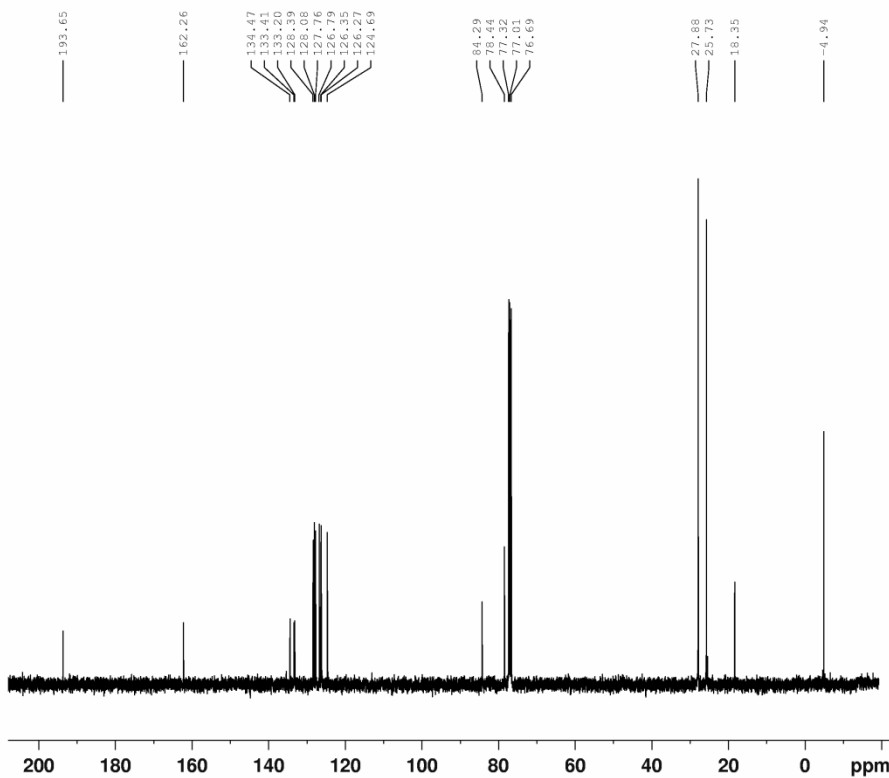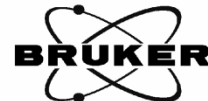

Current Data Parameters  
 NAME 3KMS216carbon  
 EXPNO 1  
 PROCNO 1

F2 - Acquisition Parameters  
 Date\_ 20100217  
 Time 10.37  
 INSTRUM spect  
 PROBHD 5 mm QNP 1H/1  
 PULPROG zgpg30  
 TD 32768  
 SOLVENT CDCl3  
 NS 836  
 DS 2  
 SWH 23980.814 Hz  
 FIDRES 0.731836 Hz  
 AQ 0.6832628 sec  
 RG 161.3  
 DW 20.850 usec  
 DE 6.00 usec  
 TE 300.0 K  
 D1 1.00000000 sec  
 d11 0.03000000 sec  
 DELTA 0.89999998 sec  
 TDO 1

===== CHANNEL f1 =====  
 NUC1 13C  
 P1 7.25 usec  
 PL1 0.00 dB  
 SFO1 100.5348134 MHz

===== CHANNEL f2 =====  
 CPDPRG2 waltz16  
 NUC2 1H  
 PCPD2 100.00 usec  
 PL2 -3.00 dB  
 PL12 16.72 dB  
 PL13 20.00 dB  
 SFO2 399.7815991 MHz

F2 - Processing parameters  
 SI 32768  
 SF 100.5247608 MHz  
 WDW EM  
 SSB 0  
 LB 1.00 Hz  
 GB 0  
 PC 1.40

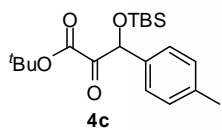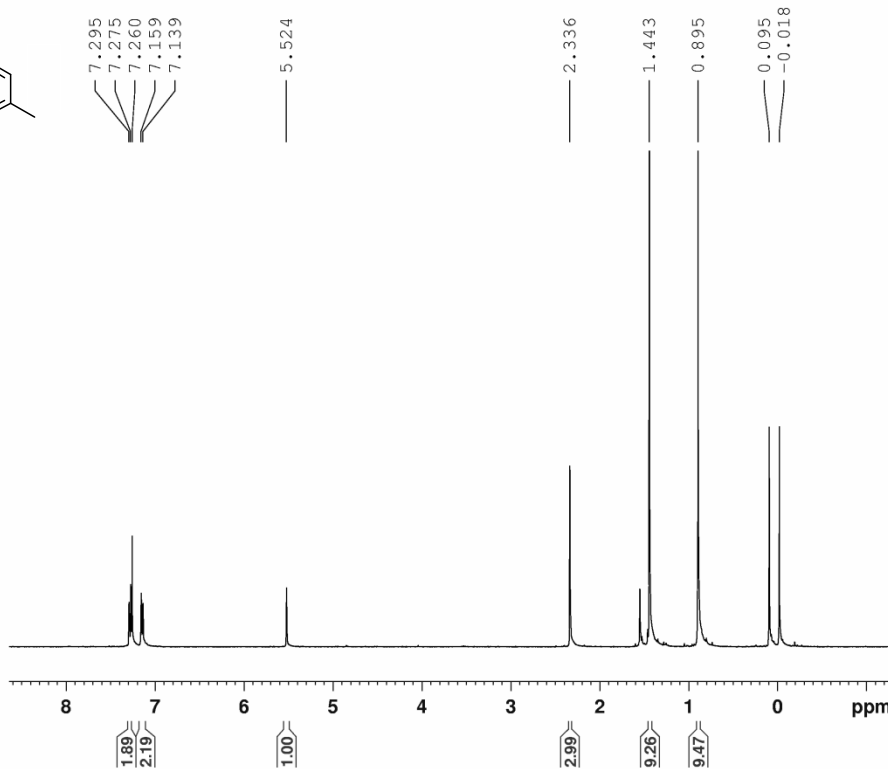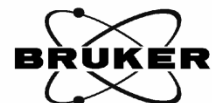

Current Data Parameters  
 NAME 4MePhb  
 EXPNO 1  
 PROCNO 1

F2 - Acquisition Parameters  
 Date\_ 20100209  
 Time 18.18  
 INSTRUM spect  
 PROBHND 5 mm QNP 1H/1  
 PULPROG zg30  
 TD 32768  
 SOLVENT CDCl3  
 NS 16  
 DS 2  
 SWH 6218.905 Hz  
 FIDRES 0.189786 Hz  
 AQ 2.6345973 sec  
 RG 256  
 DW 80.400 usec  
 DE 6.00 usec  
 TE 300.0 K  
 D1 1.00000000 sec  
 TDO 1

===== CHANNEL f1 =====  
 NUC1 1H  
 P1 9.30 usec  
 PL1 -3.00 dB  
 SFO1 399.7824920 MHz

F2 - Processing parameters  
 SI 32768  
 SF 399.7800104 MHz  
 WDW EM  
 SSB 0  
 LB 0.30 Hz  
 GB 0  
 PC 1.00

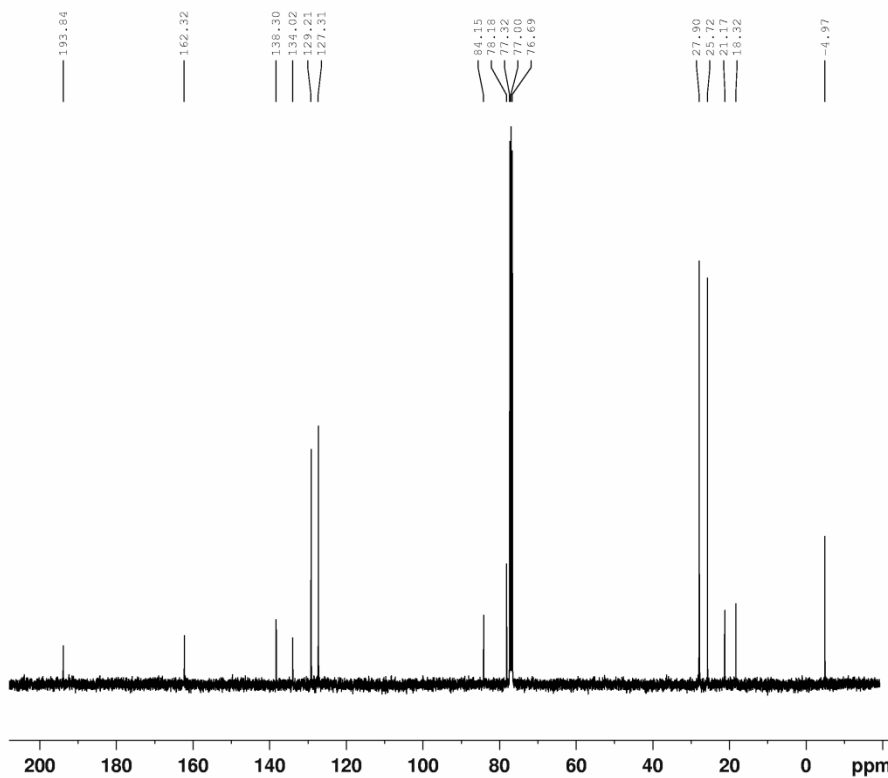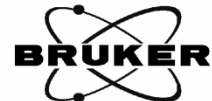

Current Data Parameters  
 NAME 4MePhcarbonb  
 EXPNO 1  
 PROCNO 1

F2 - Acquisition Parameters  
 Date\_ 20100213  
 Time 11.31  
 INSTRUM spect  
 PROBHND 5 mm QNP 1H/1  
 PULPROG zgpg30  
 TD 32768  
 SOLVENT CDCl3  
 NS 1986  
 DS 2  
 SWH 23980.814 Hz  
 FIDRES 0.731836 Hz  
 AQ 0.6832628 sec  
 RG 203.2  
 DW 20.850 usec  
 DE 6.00 usec  
 TE 300.0 K  
 D1 1.00000000 sec  
 d11 0.03000000 sec  
 DELTA 0.899999998 sec  
 TDO 1

===== CHANNEL f1 =====  
 NUC1 13C  
 P1 7.25 usec  
 PL1 0.00 dB  
 SFO1 100.5348134 MHz

===== CHANNEL f2 =====  
 CPDPRG2 waltz16  
 NUC2 1H  
 PCPD2 100.00 usec  
 PL2 -3.00 dB  
 PL12 16.72 dB  
 PL13 20.00 dB  
 SFO2 399.7815991 MHz

F2 - Processing parameters  
 SI 32768  
 SF 100.5247586 MHz  
 WDW EM  
 SSB 0  
 LB 1.00 Hz  
 GB 0  
 PC 1.40

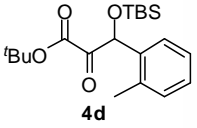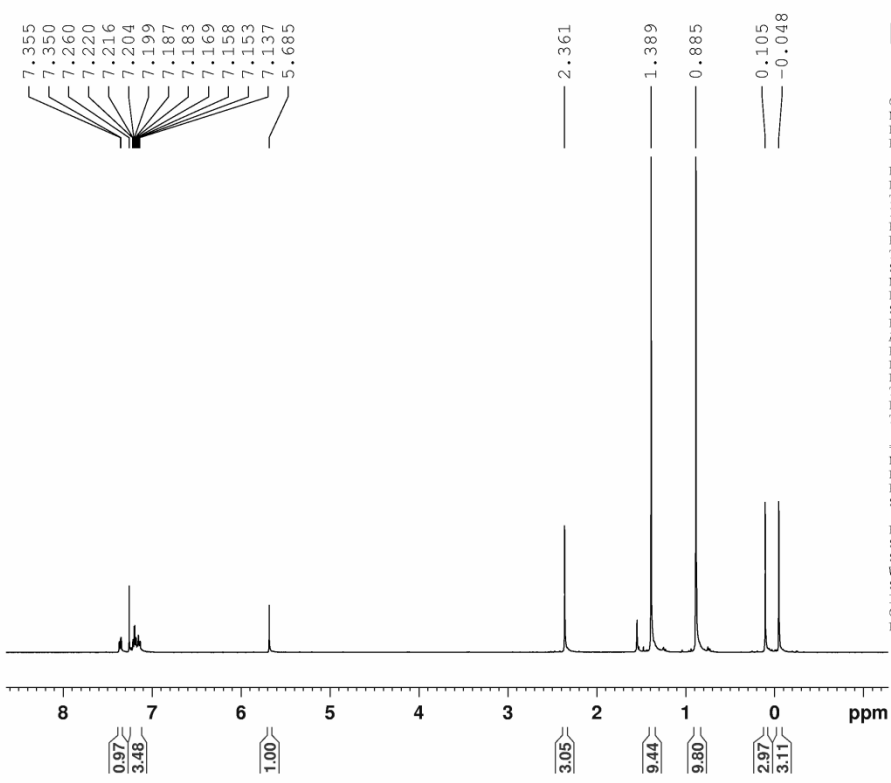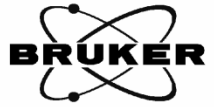

Current Data Parameters  
 NAME 2MePh  
 EXPNO 1  
 PROCNO 1

F2 - Acquisition Parameters  
 Date\_ 20100209  
 Time 18.12  
 INSTRUM spect  
 PROBHD 5 mm QNP 1H/1  
 PULPROG zg30  
 TD 32768  
 SOLVENT CDCl3  
 NS 16  
 DS 2  
 SWH 6218.905 Hz  
 FIDRES 0.189786 Hz  
 AQ 2.6345973 sec  
 RG 256  
 DW 80.400 usec  
 DE 6.00 usec  
 TE 300.0 K  
 D1 1.00000000 sec  
 TD0 1

===== CHANNEL f1 =====  
 NUC1 1H  
 P1 9.30 usec  
 PL1 -3.00 dB  
 SFO1 399.7824920 MHz

F2 - Processing parameters  
 SI 32768  
 SF 399.7800103 MHz  
 WDW EM  
 SSB 0  
 LB 0.30 Hz  
 GB 0  
 PC 1.00

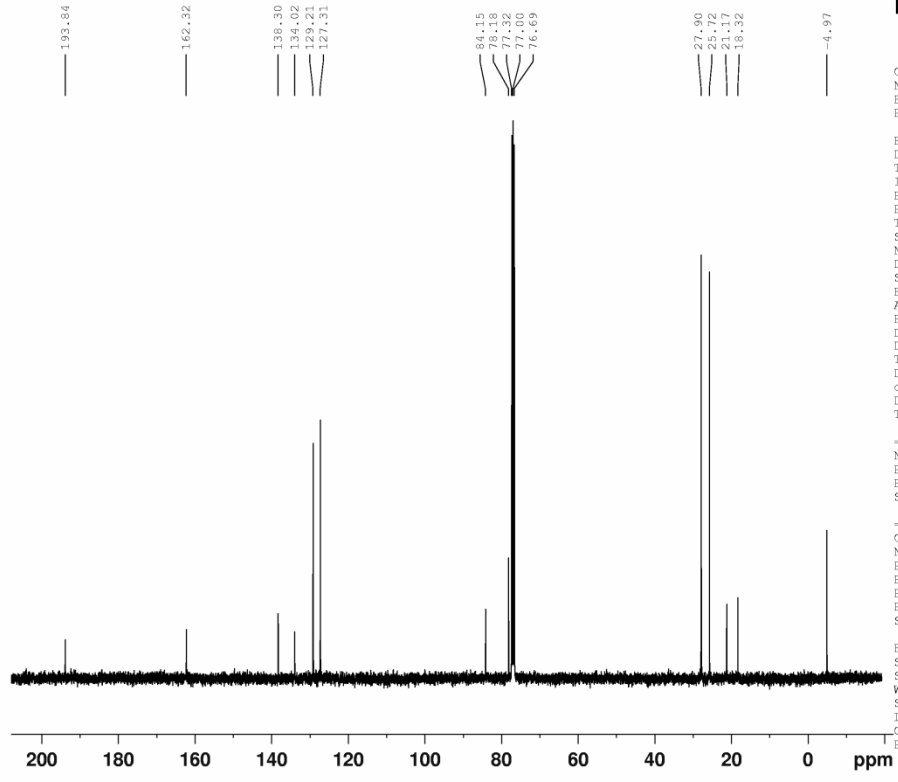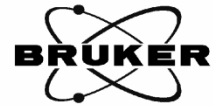

Current Data Parameters  
 NAME 4MePhcarbobb  
 EXPNO 1  
 PROCNO 1

F2 - Acquisition Parameters  
 Date\_ 20100213  
 Time 11.31  
 INSTRUM spect  
 PROBHD 5 mm QNP 1H/1  
 PULPROG zgpg30  
 TD 32768  
 SOLVENT CDCl3  
 NS 1986  
 DS 2  
 SWH 23980.814 Hz  
 FIDRES 0.731836 Hz  
 AQ 0.6832628 sec  
 RG 203.2  
 DW 20.850 usec  
 DE 6.00 usec  
 TE 300.0 K  
 D1 1.00000000 sec  
 d11 0.03000000 sec  
 DELTA 0.899999998 sec  
 TD0 1

===== CHANNEL f1 =====  
 NUC1 13C  
 P1 7.25 usec  
 PL1 0.00 dB  
 SFO1 100.5348134 MHz

===== CHANNEL f2 =====  
 CPDPRG2 waltz16  
 NUC2 1H  
 PCPD2 100.00 usec  
 PL2 -3.00 dB  
 PL12 16.72 dB  
 PL13 20.00 dB  
 SFO2 399.7815991 MHz

F2 - Processing parameters  
 SI 32768  
 SF 100.5247586 MHz  
 WDW EM  
 SSB 0  
 LB 1.00 Hz  
 GB 0  
 PC 1.40

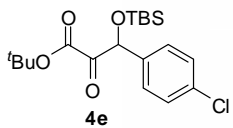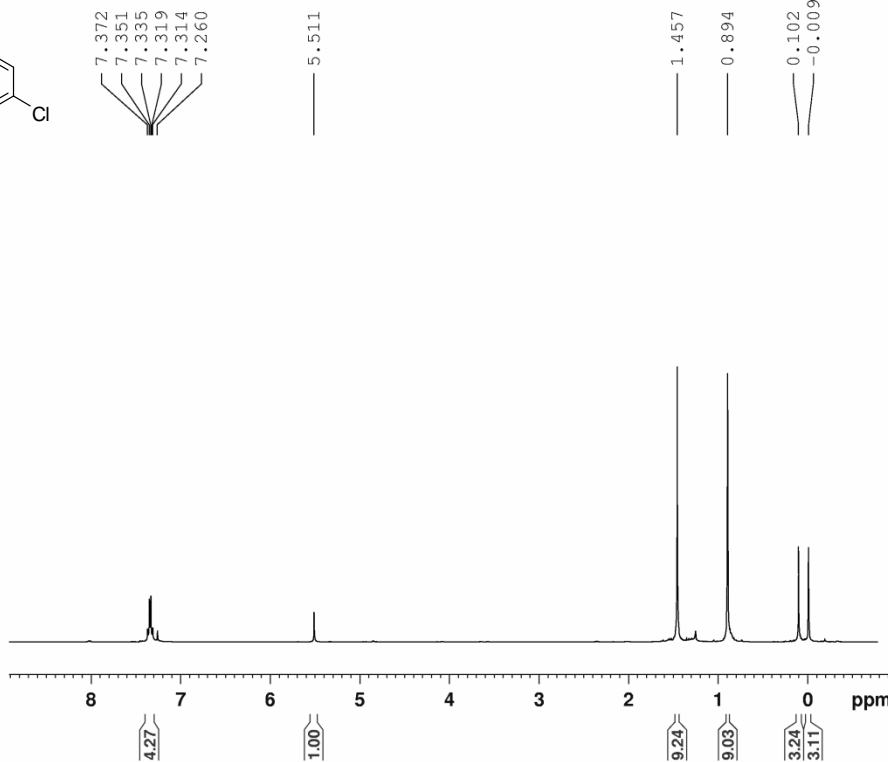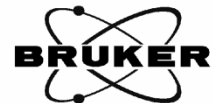

Current Data Parameters

NAME Clhighvac  
EXPNO 1  
PROCNO 1

F2 - Acquisition Parameters

Date\_ 20090605  
Time 9.12  
INSTRUM spect  
PROBHD 5 mm TXI 13C Z  
PULPROG zg30  
TD 32768  
SOLVENT CDCl3  
NS 16  
DS 2  
SWH 5341.880 Hz  
FIDRES 0.163021 Hz  
AQ 3.0672283 sec  
RG 64  
DW 93.600 usec  
DE 6.00 usec  
TE 295.0 K  
D1 1.00000000 sec  
TDO 1

===== CHANNEL f1 =====

NUC1 1H  
P1 9.95 usec  
PL1 0.00 dB  
SFO1 400.0923618 MHz

F2 - Processing parameters

SI 32768  
SF 400.0900043 MHz  
WDW EM  
SSB 0  
LB 0.25 Hz  
GB 0  
PC 1.00

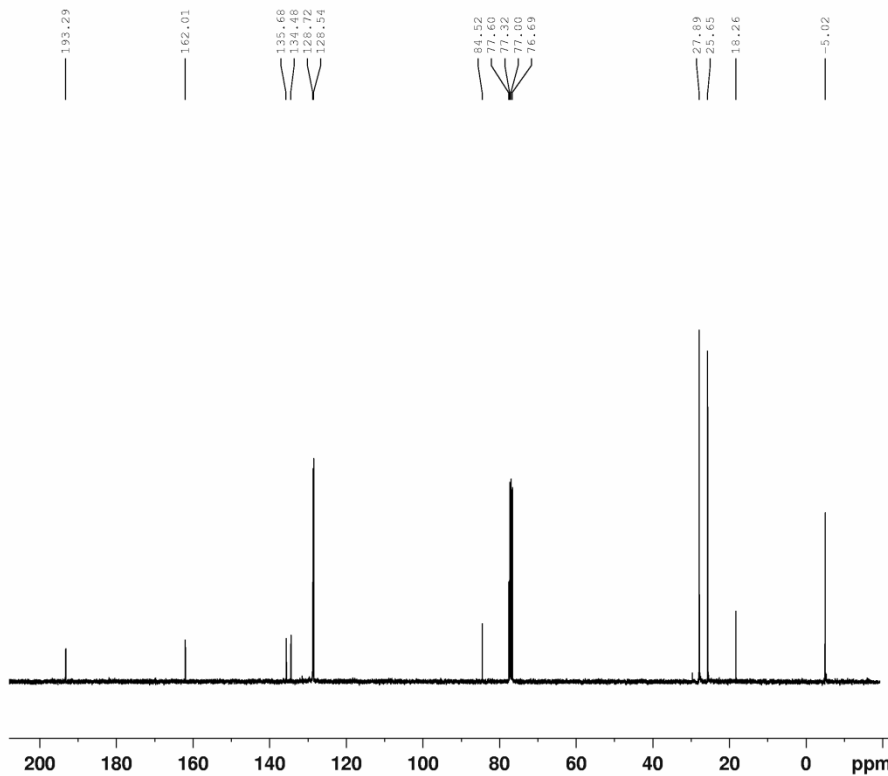

Current Data Parameters

NAME 4-Clbenzaldehyde carbon  
EXPNO 1  
PROCNO 1

F2 - Acquisition Parameters

Date\_ 20090711  
Time 9.53  
INSTRUM spect  
PROBHD 5 mm QNP 1H/1  
PULPROG zgpg30  
TD 32768  
SOLVENT CDCl3  
NS 1024  
DS 2  
SWH 23980.814 Hz  
FIDRES 0.731836 Hz  
AQ 0.6832628 sec  
RG 16384  
DW 20.850 usec  
DE 6.00 usec  
TE 300.0 K  
D1 1.00000000 sec  
d11 0.03000000 sec  
DELTA 0.89999998 sec  
TDO 1

===== CHANNEL f1 =====

NUC1 13C  
P1 7.25 usec  
PL1 0.00 dB  
SFO1 100.5499020 MHz

===== CHANNEL f2 =====

CPDPRG2 waltz16  
NUC2 1H  
PCPD2 90.00 usec  
PL2 -3.00 dB  
PL12 16.72 dB  
PL13 20.00 dB  
SFO2 399.8415994 MHz

F2 - Processing parameters

SI 32768  
SF 100.5396467 MHz  
WDW EM  
SSB 0  
LB 1.00 Hz  
GB 0  
PC 1.40

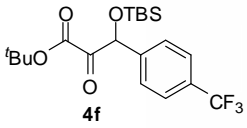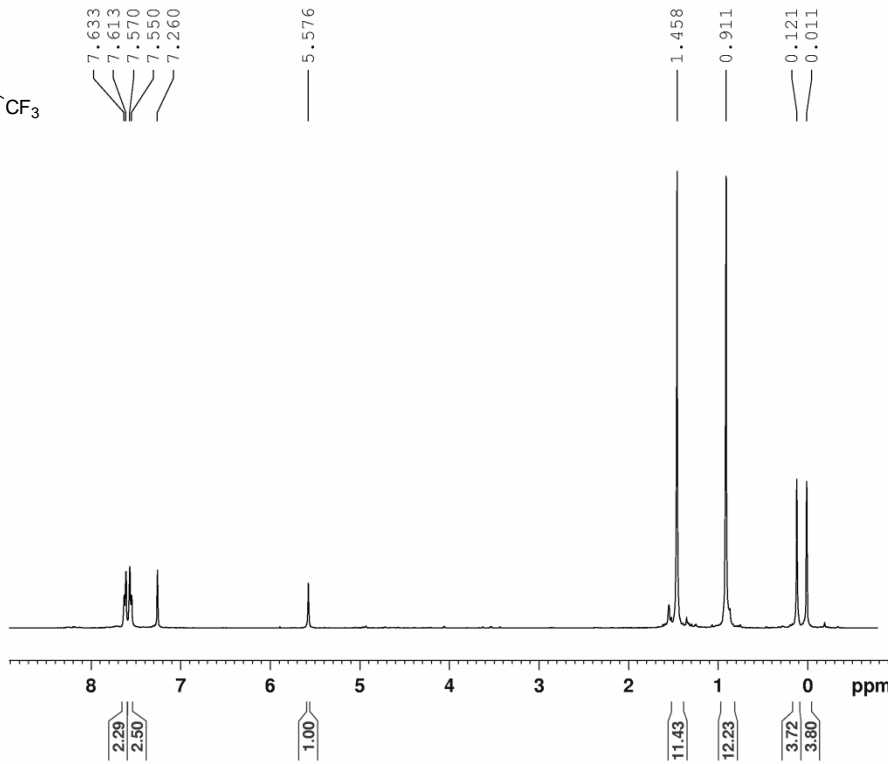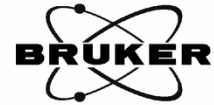

Current Data Parameters  
 NAME 3KMS239  
 EXPNO 1  
 PROCNO 1  
 F2 - Acquisition Parameters  
 Date\_ 20100220  
 Time 14.37  
 INSTRUM spect  
 PROBHD 5 mm TXI 13C Z  
 PULPROG zg30  
 TD 32768  
 SOLVENT CDCl3  
 NS 16  
 DS 2  
 SWH 5341.880 Hz  
 FIDRES 0.163021 Hz  
 AQ 3.0672283 sec  
 RG 161.3  
 DW 93.600 usec  
 DE 6.00 usec  
 TE 294.7 K  
 D1 1.00000000 sec  
 TDO 1  
 ===== CHANNEL f1 =====  
 NUC1 1H  
 P1 9.95 usec  
 PL1 0.00 dB  
 SFO1 400.0923618 MHz  
 F2 - Processing parameters  
 SI 32768  
 SF 400.0900049 MHz  
 WDW EM  
 SSB 0  
 LB 0.25 Hz  
 GB 0  
 PC 1.00

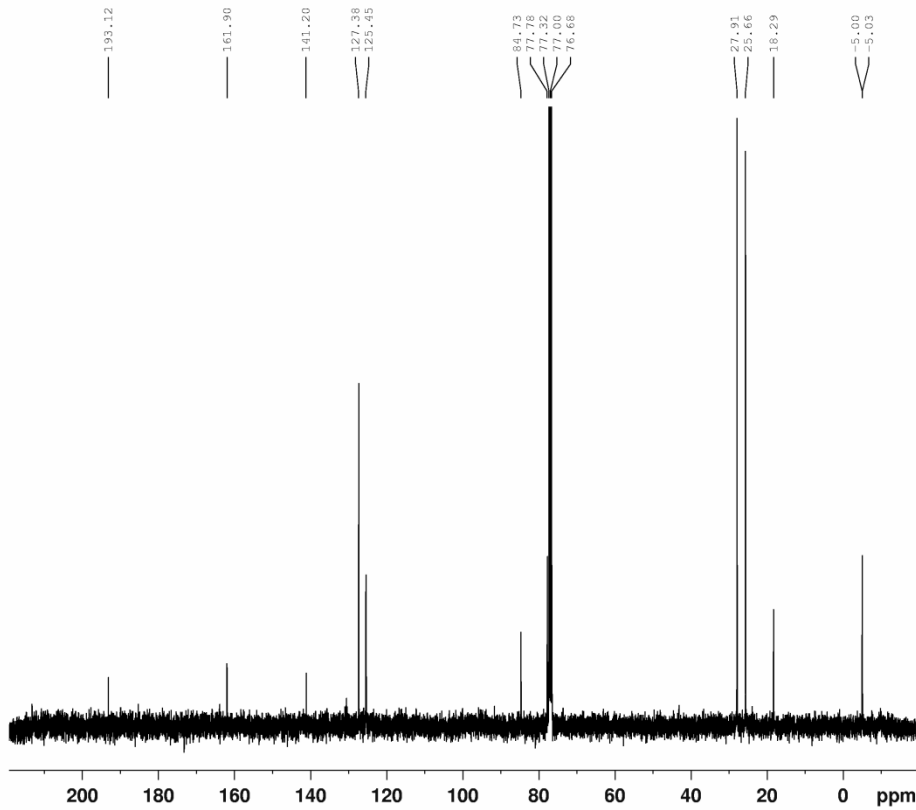

Current Data Parameters  
 NAME 3KMS239carbon  
 EXPNO 1  
 PROCNO 1  
 F2 - Acquisition Parameters  
 Date\_ 20100327  
 Time 10.06  
 INSTRUM spect  
 PROBHD 5 mm QNP 1H/1  
 PULPROG zgpg30  
 TD 32768  
 SOLVENT CDCl3  
 NS 3111  
 DS 2  
 SWH 23980.814 Hz  
 FIDRES 0.731836 Hz  
 AQ 0.6832628 sec  
 RG 143.7  
 DW 20.850 usec  
 DE 6.00 usec  
 TE 300.0 K  
 D1 1.00000000 sec  
 d11 0.03000000 sec  
 DELTA 0.89999999 sec  
 TDO 1  
 ===== CHANNEL f1 =====  
 NUC1 13C  
 P1 7.25 usec  
 PL1 0.00 dB  
 SFO1 100.5348134 MHz  
 ===== CHANNEL f2 =====  
 CDPRG2 waltz16  
 NUC2 1H  
 FCPD2 90.00 usec  
 PL2 -3.00 dB  
 PL12 16.72 dB  
 PL13 20.00 dB  
 SFO2 399.7815991 MHz  
 F2 - Processing parameters  
 SI 32768  
 SF 100.5247571 MHz  
 WDW EM  
 SSB 0  
 LB 1.00 Hz  
 GB 0  
 PC 1.40

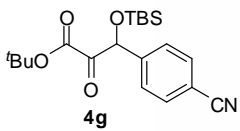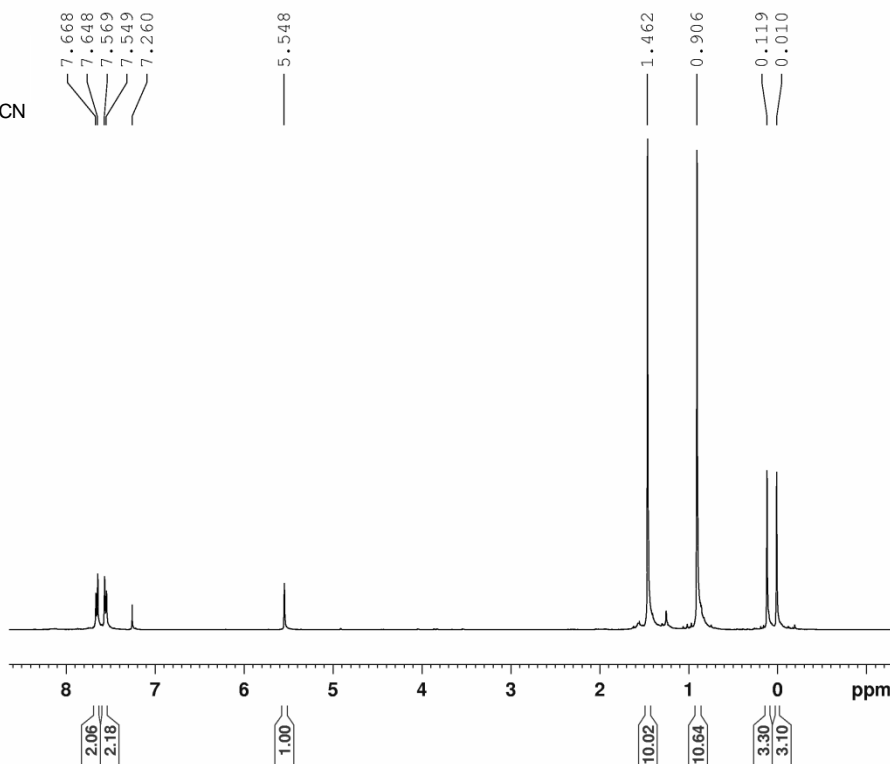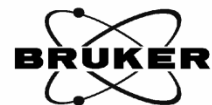

Current Data Parameters

|        |         |
|--------|---------|
| NAME   | 3KMS278 |
| EXPNO  | 1       |
| PROCNO | 1       |

F2 - Acquisition Parameters

|         |                |
|---------|----------------|
| Date_   | 20100420       |
| Time    | 9.20           |
| INSTRUM | spect          |
| PROBHD  | 5 mm QNP 1H/1  |
| PULPROG | zg30           |
| TD      | 32768          |
| SOLVENT | CDCl3          |
| NS      | 16             |
| DS      | 2              |
| SWH     | 6218.905 Hz    |
| FIDRES  | 0.189786 Hz    |
| AQ      | 2.6345973 sec  |
| RG      | 161.3          |
| DW      | 80.400 usec    |
| DE      | 6.00 usec      |
| TE      | 300.0 K        |
| D1      | 1.00000000 sec |
| TDO     | 1              |

==== CHANNEL f1 =====

|      |                 |
|------|-----------------|
| NUC1 | 1H              |
| P1   | 9.30 usec       |
| PL1  | -3.00 dB        |
| SFO1 | 399.7824920 MHz |

F2 - Processing parameters

|     |                 |
|-----|-----------------|
| SI  | 32768           |
| SF  | 399.7800105 MHz |
| WDW | EM              |
| SSB | 0               |
| LB  | 0.30 Hz         |
| GB  | 0               |
| PC  | 1.00            |

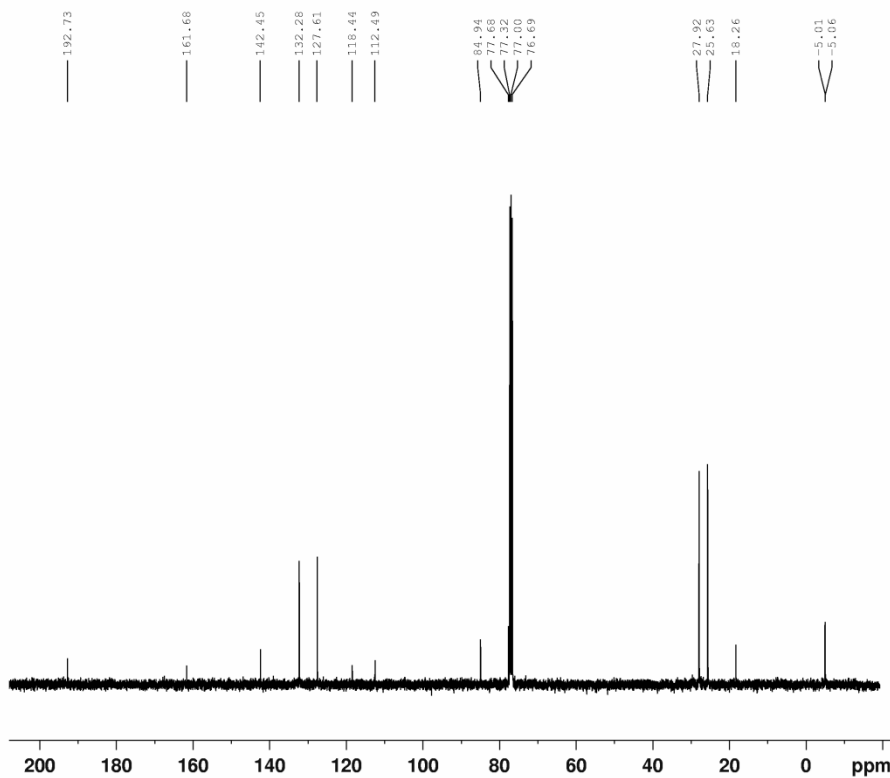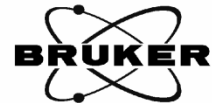

Current Data Parameters

|        |               |
|--------|---------------|
| NAME   | 3KMS278carbon |
| EXPNO  | 1             |
| PROCNO | 1             |

F2 - Acquisition Parameters

|         |                 |
|---------|-----------------|
| Date_   | 20100420        |
| Time    | 9.27            |
| INSTRUM | spect           |
| PROBHD  | 5 mm QNP 1H/1   |
| PULPROG | zgpg30          |
| TD      | 32768           |
| SOLVENT | CDCl3           |
| NS      | 1528            |
| DS      | 2               |
| SWH     | 23980.814 Hz    |
| FIDRES  | 0.731836 Hz     |
| AQ      | 0.6832628 sec   |
| RG      | 203.2           |
| DW      | 20.850 usec     |
| DE      | 6.00 usec       |
| TE      | 300.0 K         |
| D1      | 1.00000000 sec  |
| d11     | 0.03000000 sec  |
| DELTA   | 0.899999998 sec |
| TDO     | 1               |

==== CHANNEL f1 =====

|      |                 |
|------|-----------------|
| NUC1 | 13C             |
| P1   | 7.25 usec       |
| PL1  | 0.00 dB         |
| SFO1 | 100.5348134 MHz |

==== CHANNEL f2 =====

|         |                 |
|---------|-----------------|
| CPDPRG2 | waltz16         |
| NUC2    | 1H              |
| PCPD2   | 90.00 usec      |
| PL2     | -3.00 dB        |
| PL12    | 16.72 dB        |
| PL13    | 20.00 dB        |
| SFO2    | 399.7815991 MHz |

F2 - Processing parameters

|     |                 |
|-----|-----------------|
| SI  | 32768           |
| SF  | 100.5247593 MHz |
| WDW | EM              |
| SSB | 0               |
| LB  | 1.00 Hz         |
| GB  | 0               |
| PC  | 1.40            |



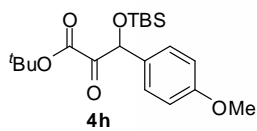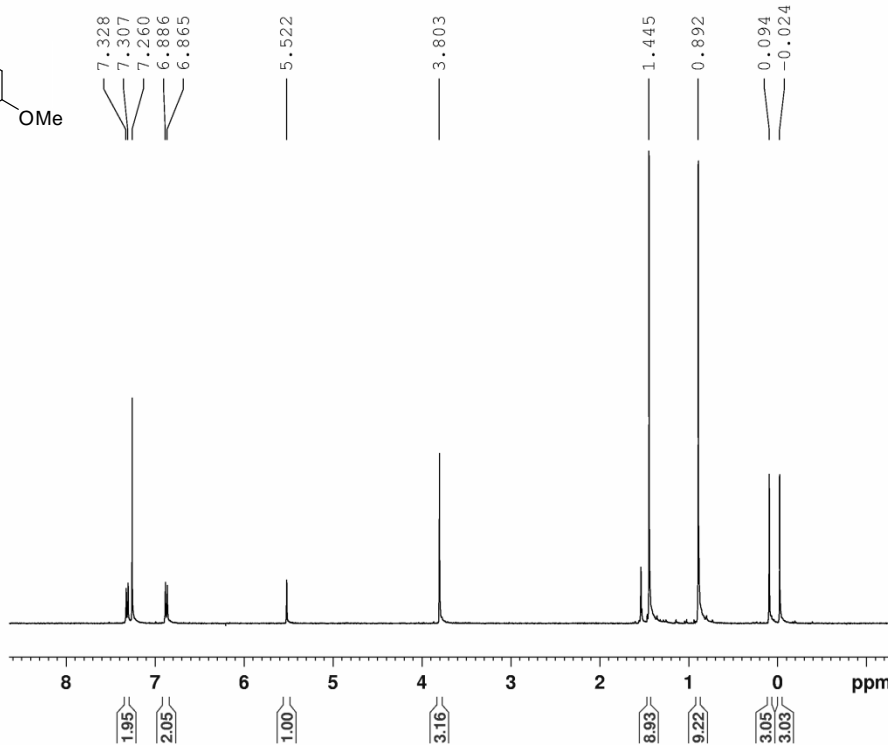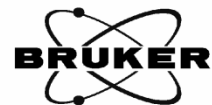

Current Data Parameters  
 NAME 40MePhprotonb  
 EXPNO 1  
 PROCNO 1  
 F2 - Acquisition Parameters  
 Date\_ 20100220  
 Time 14.04  
 INSTRUM spect  
 PROBHD 5 mm QNP 1H/1  
 PULPROG zg30  
 TD 32768  
 SOLVENT CDCl3  
 NS 16  
 DS 2  
 SWH 6218.905 Hz  
 FIDRES 0.189786 Hz  
 AQ 2.6345973 sec  
 RG 287.4  
 DW 80.400 usec  
 DE 6.00 usec  
 TE 300.0 K  
 D1 1.00000000 sec  
 TD0 1  
 ===== CHANNEL f1 =====  
 NUC1 1H  
 P1 9.30 usec  
 PL1 -3.00 dB  
 SFO1 399.7824920 MHz  
 F2 - Processing parameters  
 SI 32768  
 SF 399.7800101 MHz  
 WDW EM  
 SSB 0  
 LB 0.30 Hz  
 GB 0  
 PC 1.00

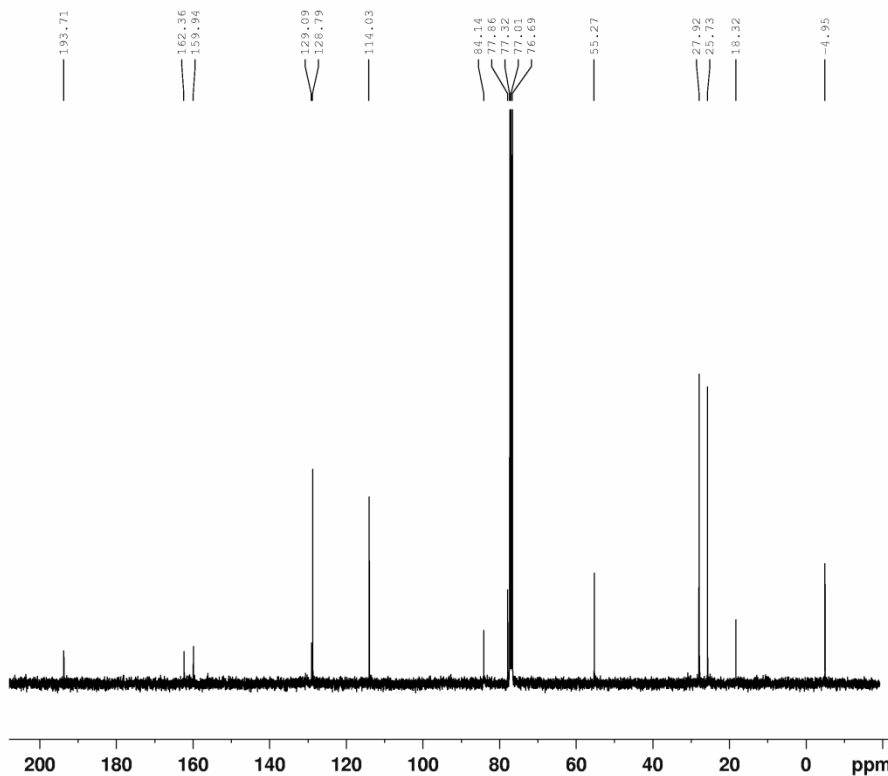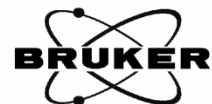

Current Data Parameters  
 NAME 40MePhprotoncarbon  
 EXPNO 1  
 PROCNO 1  
 F2 - Acquisition Parameters  
 Date\_ 20100220  
 Time 14.14  
 INSTRUM spect  
 PROBHD 5 mm QNP 1H/1  
 PULPROG zgpg30  
 TD 32768  
 SOLVENT CDCl3  
 NS 3250  
 DS 2  
 SWH 23980.814 Hz  
 FIDRES 0.731836 Hz  
 AQ 0.6832628 sec  
 RG 143.7  
 DW 20.850 usec  
 DE 6.00 usec  
 TE 300.0 K  
 D1 1.00000000 sec  
 d11 0.03000000 sec  
 DELTA 0.89999999 sec  
 TD0 1  
 ===== CHANNEL f1 =====  
 NUC1 13C  
 P1 7.25 usec  
 PL1 0.00 dB  
 SFO1 100.5348134 MHz  
 ===== CHANNEL f2 =====  
 CPDPRG2 waltz16  
 NUC2 1H  
 PCPD2 100.00 usec  
 FL2 -3.00 dB  
 PL12 16.72 dB  
 PL13 20.00 dB  
 SFO2 399.7815991 MHz  
 F2 - Processing parameters  
 SI 32768  
 SF 100.5247572 MHz  
 WDW EM  
 SSB 0  
 LB 1.00 Hz  
 GB 0  
 PC 1.40

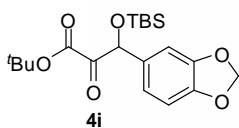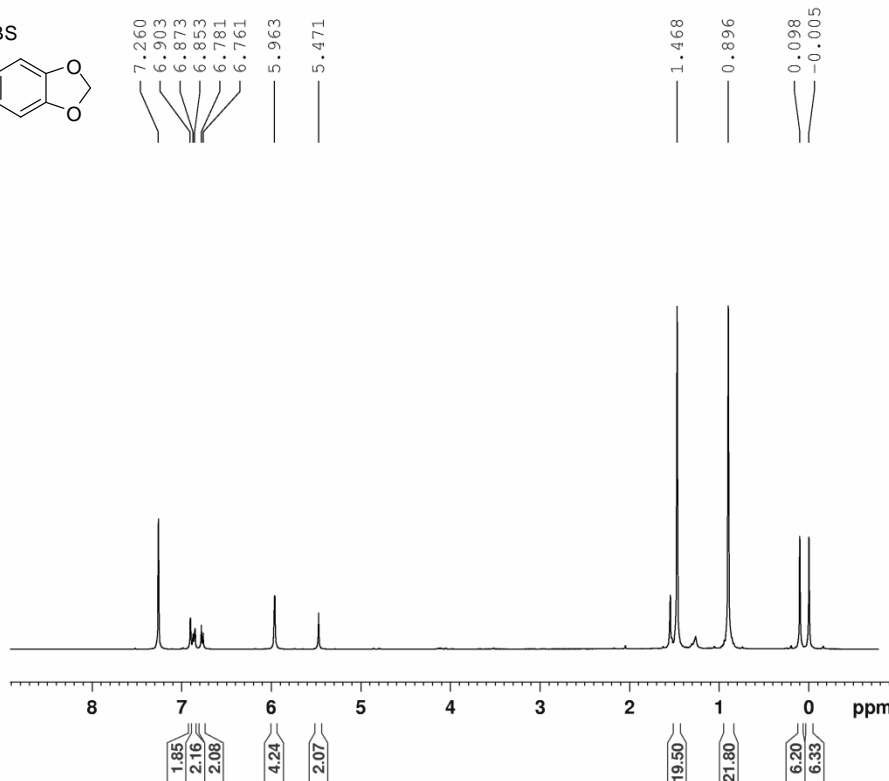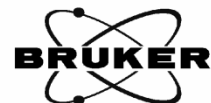

Current Data Parameters  
 NAME 3KMS213  
 EXPNO 1  
 PROCNO 1

F2 - Acquisition Parameters  
 Date\_ 20100210  
 Time 18.14  
 INSTRUM spect  
 PROBHD 5 mm TXI 13C Z  
 PULPROG zg30  
 TD 32768  
 SOLVENT CDCl3  
 NS 64  
 DS 2  
 SWH 5341.880 Hz  
 FIDRES 0.163021 Hz  
 AQ 3.0672283 sec  
 RG 406.4  
 DW 93.600 usec  
 DE 6.00 usec  
 TE 294.4 K  
 D1 1.00000000 sec  
 TDO 1

===== CHANNEL f1 =====  
 NUC1 1H  
 P1 9.95 usec  
 PL1 0.00 dB  
 SFO1 400.0923618 MHz

F2 - Processing parameters  
 SI 65536  
 SF 400.0900031 MHz  
 WDW EM  
 SSB 0  
 LB 0.60 Hz  
 GB 0  
 PC 1.00

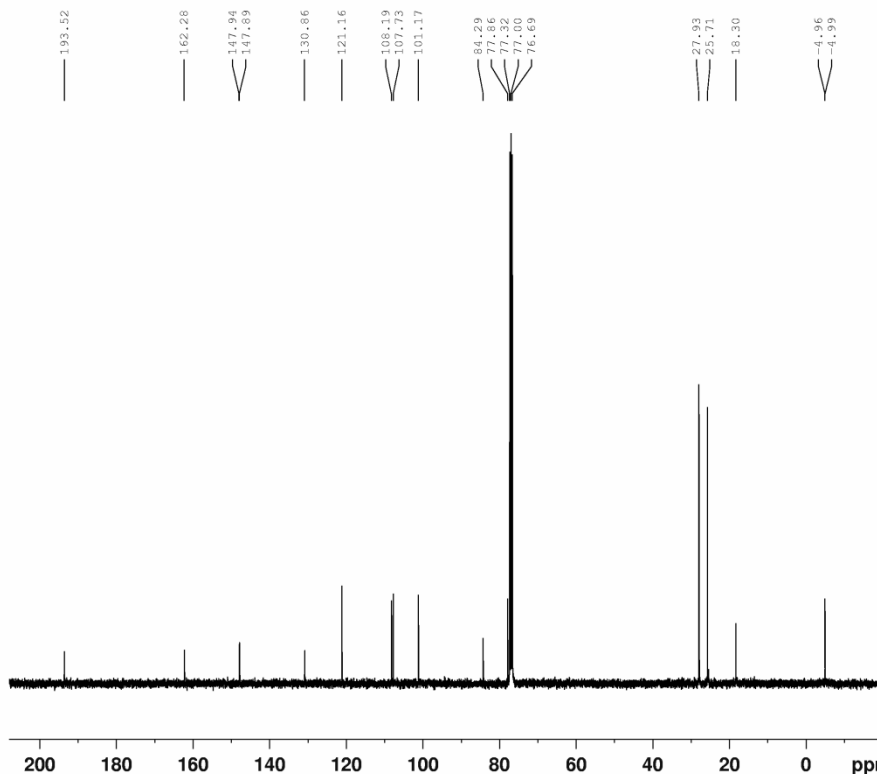

Current Data Parameters  
 NAME 3KMS239  
 EXPNO 1  
 PROCNO 1

F2 - Acquisition Parameters  
 Date\_ 20100403  
 Time 10.30  
 INSTRUM spect  
 PROBHD 5 mm QNP 1H/1  
 PULPROG zgpg30  
 TD 32768  
 SOLVENT CDCl3  
 NS 3066  
 DS 2  
 SWH 23980.814 Hz  
 FIDRES 0.731836 Hz  
 AQ 0.6832628 sec  
 RG 1024  
 DW 20.850 usec  
 DE 6.00 usec  
 TE 300.0 K  
 D1 1.00000000 sec  
 d11 0.03000000 sec  
 DELTA 0.89999998 sec  
 TDO 1

===== CHANNEL f1 =====  
 NUC1 13C  
 P1 7.25 usec  
 PL1 0.00 dB  
 SFO1 100.5348134 MHz

===== CHANNEL f2 =====  
 CPDPRG2 waltz16  
 NUC2 1H  
 PCPD2 90.00 usec  
 FL2 -3.00 dB  
 PL12 16.72 dB  
 PL13 20.00 dB  
 SFO2 399.7815991 MHz

F2 - Processing parameters  
 SI 32768  
 SF 100.5247586 MHz  
 WDW EM  
 SSB 0  
 LB 1.00 Hz  
 GB 0  
 PC 1.40

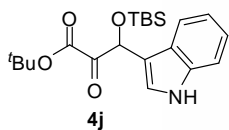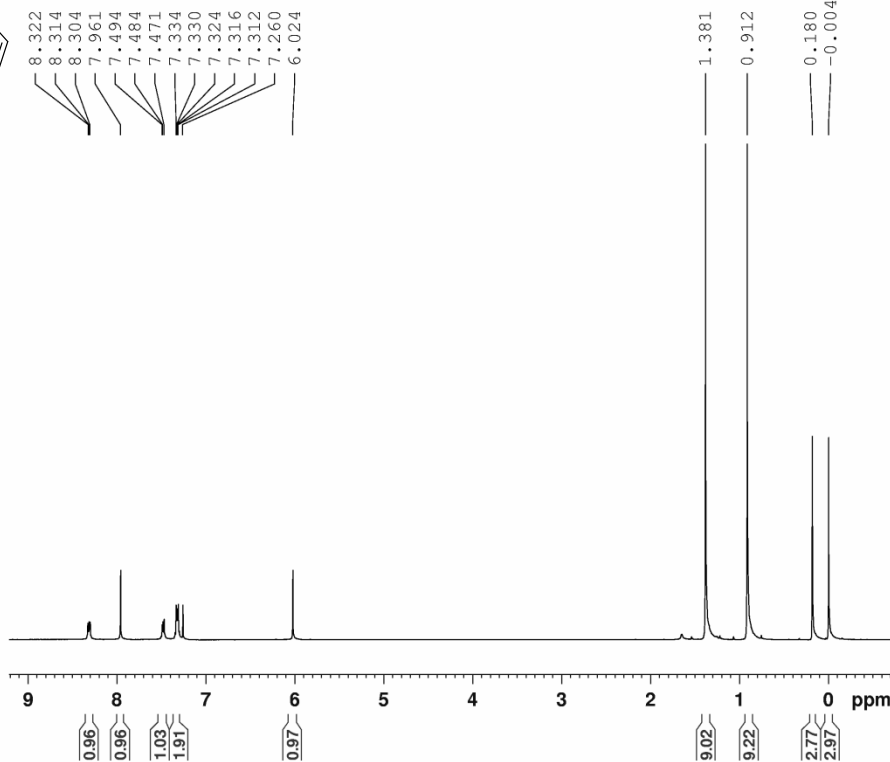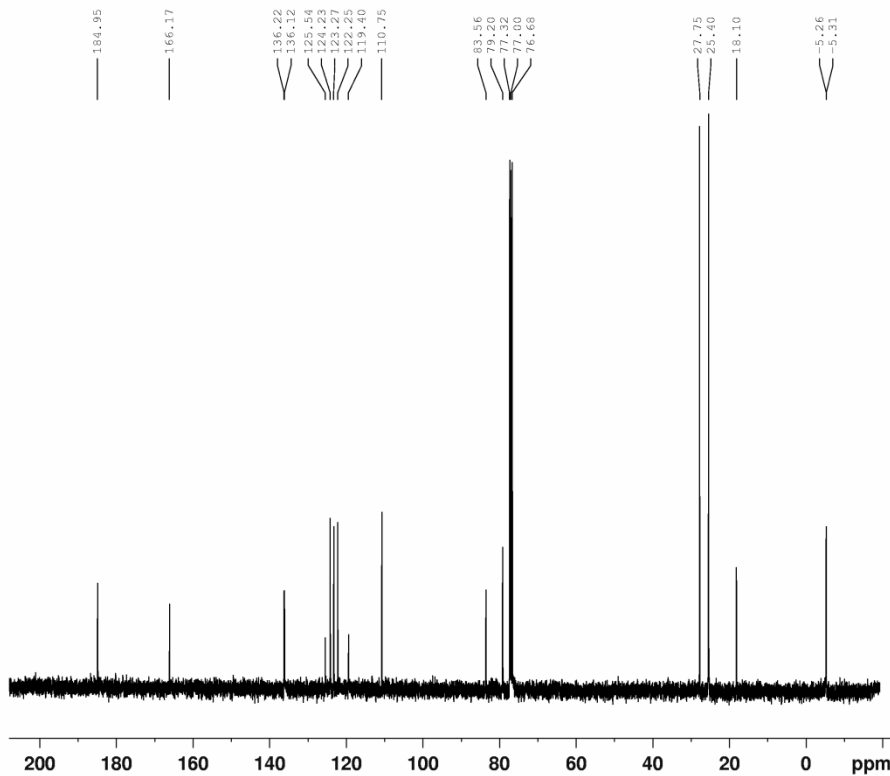

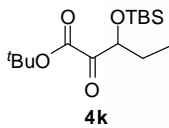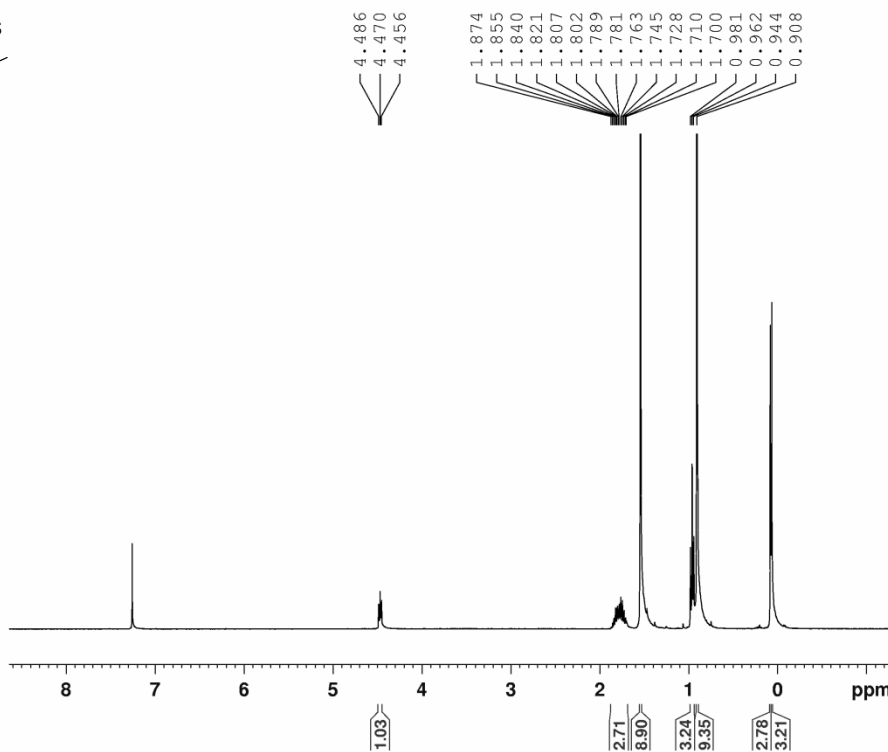

Current Data Parameters  
 NAME 3KMS231B  
 EXPNO 1  
 PROCNO 1

F2 - Acquisition Parameters  
 Date\_ 20100216  
 Time 14.39  
 INSTRUM spect  
 PROBH 5 mm QNP 1H/1  
 PULPROG zg30  
 TD 32768  
 SOLVENT CDCl3  
 NS 16  
 DS 2  
 SWH 6218.905 Hz  
 FIDRES 0.189786 Hz  
 AQ 2.6345973 sec  
 RG 256  
 DW 80.400 usec  
 DE 6.00 usec  
 TE 300.0 K  
 D1 1.00000000 sec  
 TDO 1

===== CHANNEL f1 =====  
 NUC1 1H  
 P1 9.30 usec  
 PL1 -3.00 dB  
 SFO1 399.7824920 MHz

F2 - Processing parameters  
 SI 32768  
 SF 399.7800105 MHz  
 WDW EM  
 SSB 0  
 LB 0.60 Hz  
 GB 0  
 PC 1.00

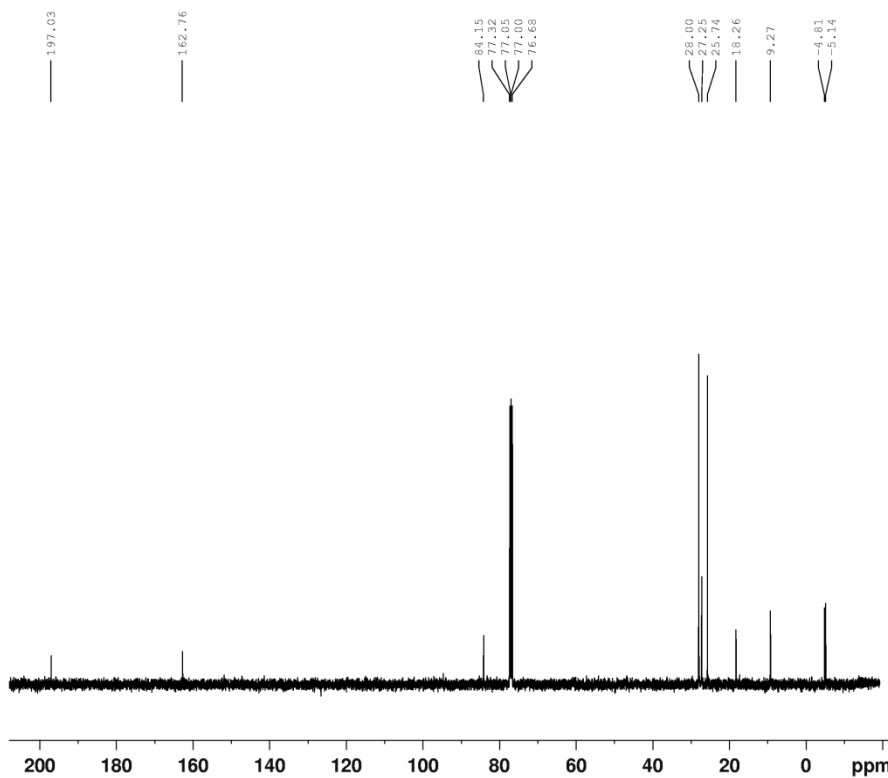

Current Data Parameters  
 NAME 2KMS231carbon  
 EXPNO 1  
 PROCNO 1

F2 - Acquisition Parameters  
 Date\_ 20100216  
 Time 17.00  
 INSTRUM spect  
 PROBH 5 mm QNP 1H/1  
 PULPROG zgpg30  
 TD 32768  
 SOLVENT CDCl3  
 NS 804  
 DS 2  
 SWH 23980.814 Hz  
 FIDRES 0.731836 Hz  
 AQ 0.6832628 sec  
 RG 143.7  
 DW 20.850 usec  
 DE 6.00 usec  
 TE 300.0 K  
 D1 1.00000000 sec  
 d11 0.03000000 sec  
 DELTA 0.89999998 sec  
 TDO 1

===== CHANNEL f1 =====  
 NUC1 13C  
 P1 7.25 usec  
 PL1 0.00 dB  
 SFO1 100.5348134 MHz

===== CHANNEL f2 =====  
 CPDPRG2 waltz16  
 NUC2 1H  
 PCPD2 100.00 usec  
 PL2 -3.00 dB  
 PL12 16.72 dB  
 PL13 20.00 dB  
 SFO2 399.7815991 MHz

F2 - Processing parameters  
 SI 32768  
 SF 100.5247585 MHz  
 WDW EM  
 SSB 0  
 LB 1.00 Hz  
 GB 0  
 PC 1.40



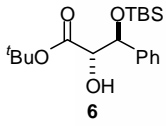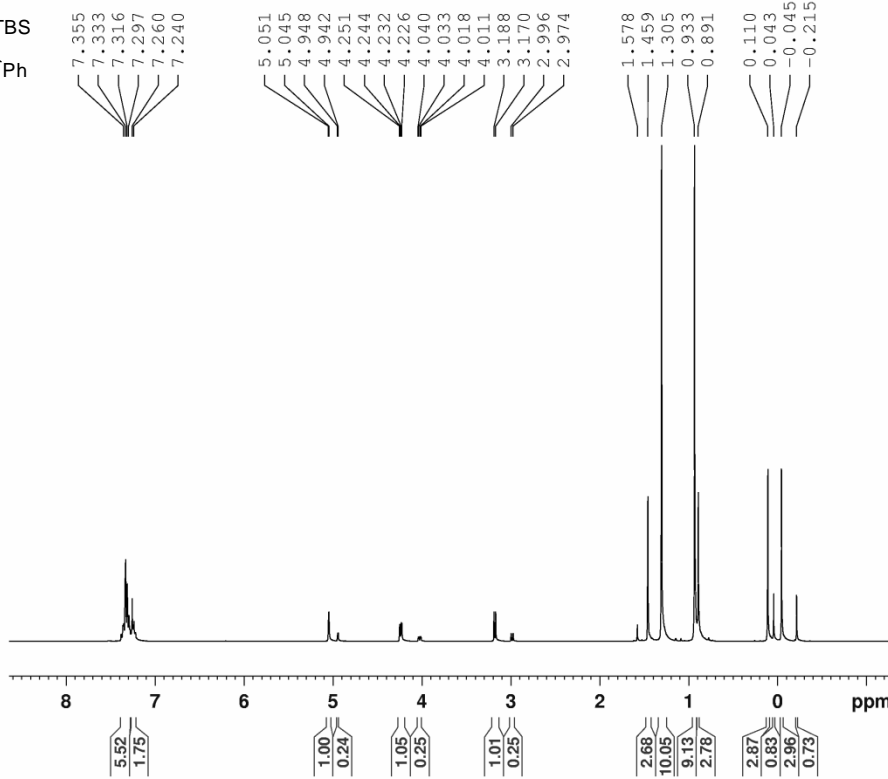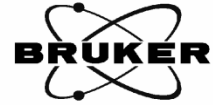

Current Data Parameters  
 NAME 3KMS209  
 EXPNO 1  
 PROCNO 1

F2 - Acquisition Parameters  
 Date\_ 20100319  
 Time 11.33  
 INSTRUM spect  
 PROBHD 5 mm QNP 1H/1  
 PULPROG zg30  
 TD 32768  
 SOLVENT CDCl3  
 NS 16  
 DS 2  
 SWH 6218.905 Hz  
 FIDRES 0.189786 Hz  
 AQ 2.6345973 sec  
 RG 143.7  
 DW 80.400 usec  
 DE 6.00 usec  
 TE 300.0 K  
 D1 1.00000000 sec  
 TD0 1

===== CHANNEL f1 =====  
 NUC1 1H  
 P1 9.30 usec  
 PL1 -3.00 dB  
 SFO1 399.7824920 MHz

F2 - Processing parameters  
 SI 32768  
 SF 399.7800101 MHz  
 WDW EM  
 SSB 0  
 LB 0.30 Hz  
 GB 0  
 PC 1.00

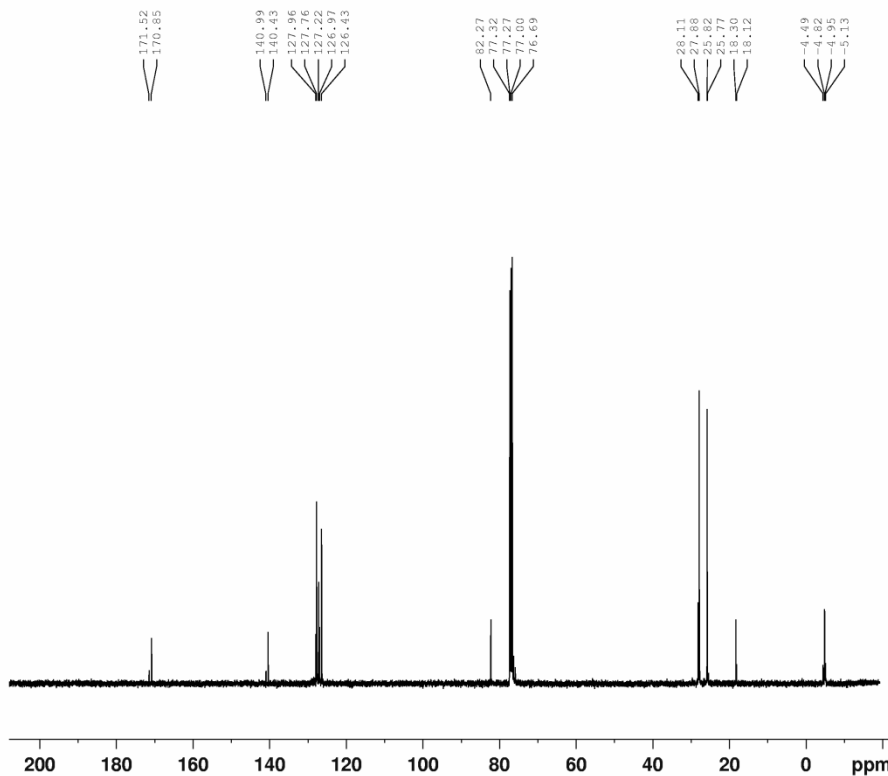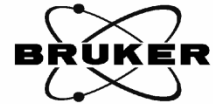

Current Data Parameters  
 NAME Phdiolcarbon  
 EXPNO 1  
 PROCNO 1

F2 - Acquisition Parameters  
 Date\_ 20100206  
 Time 9.20  
 INSTRUM spect  
 PROBHD 5 mm QNP 1H/1  
 PULPROG zgpg30  
 TD 32768  
 SOLVENT CDCl3  
 NS 2749  
 DS 2  
 SWH 23980.814 Hz  
 FIDRES 0.731836 Hz  
 AQ 0.6832628 sec  
 RG 161.3  
 DW 20.850 usec  
 DE 6.00 usec  
 TE 300.0 K  
 D1 1.00000000 sec  
 d11 0.03000000 sec  
 DELTA 0.89999998 sec  
 TD0 1

===== CHANNEL f1 =====  
 NUC1 13C  
 P1 7.25 usec  
 PL1 0.00 dB  
 SFO1 100.5348134 MHz

===== CHANNEL f2 =====  
 CPDPRG2 waltz16  
 NUC2 1H  
 PCPD2 100.00 usec  
 PL2 -3.00 dB  
 PL12 16.72 dB  
 PL13 20.00 dB  
 SFO2 399.7815991 MHz

F2 - Processing parameters  
 SI 32768  
 SF 100.5247601 MHz  
 WDW EM  
 SSB 0  
 LB 1.00 Hz  
 GB 0  
 PC 1.40

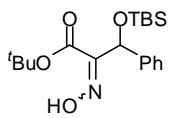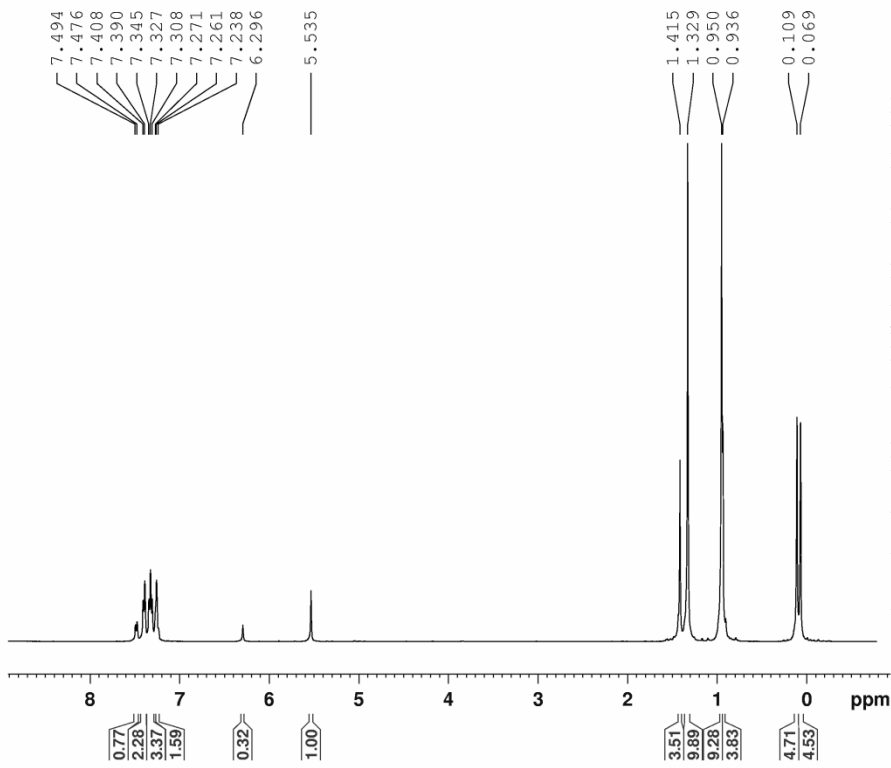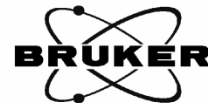

Current Data Parameters  
 NAME 3KMS232column  
 EXPNO 1  
 PROCNO 1

F2 - Acquisition Parameters  
 Date\_ 20100217  
 Time 13.59  
 INSTRUM spect  
 PROBHD 5 mm TXI 13C Z  
 PULPROG zg30  
 TD 32768  
 SOLVENT CDCl3  
 NS 16  
 DS 2  
 SWH 5341.880 Hz  
 FIDRES 0.163021 Hz  
 AQ 3.0672283 sec  
 RG 114  
 DW 93.600 usec  
 DE 6.00 usec  
 TE 294.7 K  
 D1 1.00000000 sec  
 TD0 1

===== CHANNEL f1 =====  
 NUC1 1H  
 P1 9.95 usec  
 PL1 0.00 dB  
 SFO1 400.0923618 MHz

F2 - Processing parameters  
 SI 32768  
 SF 400.0900042 MHz  
 WDW EM  
 SSB 0  
 LB 0.25 Hz  
 GB 0  
 PC 1.00

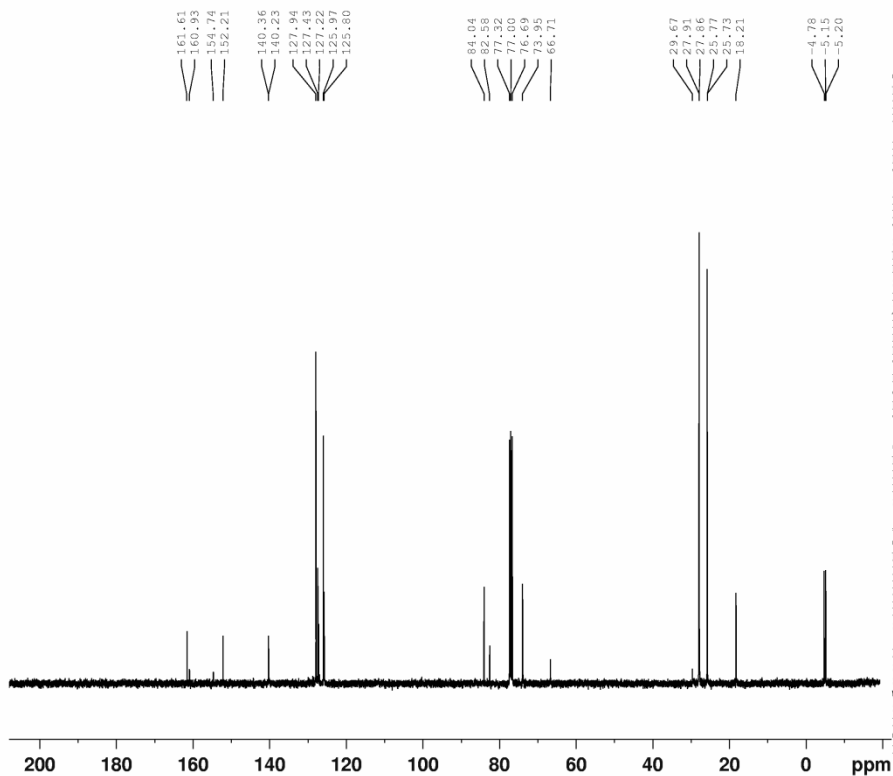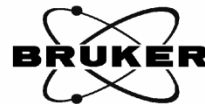

Current Data Parameters  
 NAME 3KMS265carbon  
 EXPNO 1  
 PROCNO 1

F2 - Acquisition Parameters  
 Date\_ 20100311  
 Time 16.11  
 INSTRUM spect  
 PROBHD 5 mm QNP 1H/1  
 PULPROG zgpg30  
 TD 32768  
 SOLVENT CDCl3  
 NS 1024  
 DS 2  
 SWH 23980.814 Hz  
 FIDRES 0.731836 Hz  
 AQ 0.6832628 sec  
 RG 161.3  
 DW 20.850 usec  
 DE 6.00 usec  
 TE 300.0 K  
 D1 1.00000000 sec  
 d11 0.03000000 sec  
 DELTA 0.89999998 sec  
 TD0 1

===== CHANNEL f1 =====  
 NUC1 13C  
 P1 7.25 usec  
 PL1 0.00 dB  
 SFO1 100.5348134 MHz

===== CHANNEL f2 =====  
 CPDPRG2 waltz16  
 NUC2 1H  
 PCPD2 90.00 usec  
 PL2 -3.00 dB  
 PL12 16.72 dB  
 PL13 20.00 dB  
 SFO2 399.7815991 MHz

F2 - Processing parameters  
 SI 32768  
 SF 100.5247622 MHz  
 WDW EM  
 SSB 0  
 LB 1.00 Hz  
 GB 0  
 PC 1.40
